# Supplementary material for: Complexes of transition metal carbonyl clusters with tin(ii) phthalocyanine in neutral and radical anion states: methods of synthesis, structures and properties
Source: Royal Society of Chemistry journal article supplement (doi:10.1039/d1dt04061h), 2021-12-29
Supplement: d1dt04061h1.pdf [file d1dt04061h1.pdf]

**Complexes of tin(II) phthalocyanine in neutral and radical anion states with transition metal carbonyl clusters: methods of synthesis, structures and properties.**

Nikita R. Romanenko,<sup>a</sup> Alexey V. Kuzmin,<sup>b</sup> Salavat S. Khasanov,<sup>b</sup> Maxim A. Faraonov,<sup>a</sup> Evgeniya I. Yudanova,<sup>a</sup> Yoshiaki Nakano,<sup>c,d</sup> Akihiro Otsuka,<sup>c,d</sup> Hideki Yamochi,<sup>c,d</sup> Hiroshi Kitagawa,<sup>c</sup> and Dmitri V. Konarev<sup>a\*</sup>

<sup>a</sup>Institute of Problems of Chemical Physics RAS, Chernogolovka, Moscow region, 142432 Russia;

<sup>b</sup>Institute of Solid State Physics RAS, Chernogolovka, Moscow region, 142432 Russia;

<sup>c</sup>Division of Chemistry, Graduate School of Science, Kyoto University, Sakyo-ku, Kyoto 606-8502, Japan;

<sup>d</sup>Research Center for Low Temperature and Materials Sciences, Kyoto University, Sakyo-ku, Kyoto 606-8501, Japan.

## EXPERIMENTAL

**Materials.** Tin(II) and tin(IV) dichloride phthalocyanines ( $\text{Sn}^{\text{II}}\text{Pc}$  and  $\text{Sn}^{\text{IV}}\text{Cl}_2\text{Pc}$ , respectively, >98%), tetracobalt dodecacarbonyl ( $\text{Co}_4(\text{CO})_{12}$ , >98%), dicobalt octacarbonyl ( $\text{Co}_2(\text{CO})_8$ , stabilized with 1-5% of *n*-hexane), iridium carbonyl ( $\text{Ir}_4(\text{CO})_{12}$ , >98%), ruthenium carbonyl ( $\text{Ru}_3(\text{CO})_{12}$ , >99%), osmium carbonyl ( $\text{Os}_3(\text{CO})_{12}$ , >99%), decamethylchromocene ( $\text{Cp}^*_2\text{Cr}$ , >95%), and potassium graphite ( $\text{KC}_8$ ) were purchased from Strem. Cryptand[2.2.2] (hereafter abbreviated as Cryptand) was purchased from Acros. Sodium fluorenone ketyl was obtained according to Ref. [1]. Cesium anthracenide was obtained according to Ref. [2]. *o*-Dichlorobenzene ( $\text{C}_6\text{H}_4\text{Cl}_2$ , 99%) was distilled over  $\text{CaH}_2$  under reduced pressure in argon atmosphere, and *n*-hexane was distilled over Na/benzophenone in argon atmosphere. Solvents were degassed and stored in an MBraun 150B-G glove box. Complexes **1** - **6** were synthesized and stored in the glove box with controlled atmosphere containing less than 1 ppm of water and oxygen. KBr pellets used for the IR and UV-visible-NIR analyses of **1-5** were prepared in the glove box. Magnetic measurements were performed on carefully purified and tested crystals of **1**, **2**, **4** and **5** sealed in a 2 mm quartz tube under ambient pressure of argon.

**General.** UV-visible-NIR spectra were measured in KBr pellets on a PerkinElmer Lambda 1050 spectrometer in the 250-2500 nm range. FT-IR spectra were obtained in KBr pellets with a PerkinElmer Spectrum 400 spectrometer ( $400\text{-}7800\text{ cm}^{-1}$ ). EPR spectra were recorded for a polycrystalline sample of **1**, **2**, **4** and **5** from room temperature (295 K) down to liquid helium temperature with a JEOL JES-TE 200 X-band ESR spectrometer equipped with a JEOL ES-CT470 cryostat. A Quantum Design MPMS-XL SQUID magnetometer was used to measure static magnetic susceptibilities of **1**, **2**, **4** and **5** at 100 mT magnetic field in cooling and heating conditions in the 300 – 1.9 K range. A sample holder contribution and core temperature independent diamagnetic susceptibility ( $\chi_d$ ) were subtracted from the experimental data. The  $\chi_d$  values were estimated by the extrapolation of the data in the high-temperature range by fitting the data with the following expression:  $\chi_M = C/(T - \Theta) + \chi_d$ , where  $C$  is Curie constant

and  $\Theta$  is Weiss temperature. Effective magnetic moment ( $\mu_{\text{eff}}$ ) was calculated with the following formula:  $\mu_{\text{eff}} = (8 \cdot \chi_M \cdot T)^{1/2}$

**Synthesis.** Crystals of **1-6** were obtained by diffusion technique. The obtained solutions were cooled down to room temperature and filtered into the 1.8-cm-diameter, 50 mL glass tube with a ground glass plug, and then 24 mL of *n*-hexane was layered over the solution. Slow mixing of the solutions over 1-1.5 months resulted in precipitation of crystals. The solvent was then decanted from the crystals, and they were washed with *n*-hexane.

Crystals of  $\{\text{Co}_4(\text{CO})_{11} \cdot \text{Sn}^{\text{II}}(\text{Pc}^{2-})\}$  (**1**) were obtained via the interaction of  $\text{Sn}^{\text{II}}\text{Pc}$  (26.6 mg, 0.042 mmol) with 2.2 equivalents of  $\text{Co}_2(\text{CO})_8$  (31.1 mg, 0.046 mmol) in *o*-dichlorobenzene upon stirring the solution during one day at 60°C. Phthalocyanine was completely dissolved to form deep green solution. After slow mixing with *n*-hexane black crystals were obtained in 65% yield. As it was discussed in the main text, this sample contained impurity of metallic cobalt which manifested broad EPR signals. Alternative method of the synthesis of **1** was an interaction of  $\text{Sn}^{\text{II}}\text{Pc}$  (26.6 mg, 0.042 mmol) and one equivalent of  $\text{Co}_4(\text{CO})_{12}$  (23.9 mg, 0.042 mmol) during one day at room temperature. Phthalocyanine completely dissolved to form deep green solution. After slow mixing with *n*-hexane black prisms were obtained in 71% yield. Analysis of the unit cell parameters of obtained crystals in both synthesis showed that they are isostructural and have the same IR and UV-visible-NIR spectra. However, measurements of EPR spectra at room and liquid helium temperatures indicated the absence of any EPR signals and, therefore, second syntheses allowed us to obtain EPR silent crystals of **1** without impurities. Elemental analysis confirmed the composition of **1** determined from X-ray diffraction:  $\text{C}_{43}\text{H}_{16}\text{Co}_4\text{N}_8\text{O}_{11}\text{Sn}$ ,  $M_r = 1175.05 \text{ g mol}^{-1}$ : Calcd. C = 43.95, H = 1.36, N = 9.53%; Found: C = 43.12, H = 1.28, N = 9.18%.

For preparation of  $\{\text{Cryptand}(\text{Na}^+)\}\{\text{Ru}_3(\text{CO})_{11} \cdot \text{Sn}^{\text{II}}(\text{Pc}^{\bullet 3-})\}^-$  (**2**), salt  $\{\text{Cryptand}(\text{Na}^+)\}\{\text{Sn}^{\text{II}}(\text{Pc}^{\bullet 3-})\}^-$  was generated in solution.  $\text{Sn}^{\text{II}}\text{Pc}$  (26.6 mg, 0.042 mmol) was reduced by slight excess of sodium fluorenone ketyl ( $\text{C}_{13}\text{H}_8\text{ONa}$ ) (11.4 mg, 0.056 mmol) in the presence of one equivalent of Cryptand (16 mg, 0.042 mmol) in 17 ml of *o*-dichlorobenzene during one day at 60°C. Phthalocyanine completely dissolved to form deep blue solution which was cooled down to room temperature and filtered into the

flask containing 26.7 mg of  $\text{Ru}_3(\text{CO})_{12}$  (0.042 mmol). Solution was stirred for one more day at  $60^\circ\text{C}$ , and colour of the solution remained unchanged. Solution was cooled down to room temperature and filtered into a tube for diffusion. Large black crystals precipitated after slow mixing with *n*-hexane during 1 month. Solvent was decanted and crystals were washed by *n*-hexane to yield black blocks with copper lustre characteristic of reduced phthalocyanines. The yield of crystals was 56%.

Similar reactions were carried out for  $\text{Co}_4(\text{CO})_{12}$  and  $\text{Ir}_4(\text{CO})_{12}$  clusters. Addition of  $\{\text{Cryptand}(\text{Na}^+)\}\{\text{Sn}^{\text{II}}(\text{Pc}^{\bullet 3-})\}^-$  salt to  $\text{Co}_4(\text{CO})_{12}$  provided color change from deep blue to green. No crystals were obtained in this case after slow mixing with *n*-hexane. On the contrary, upon mixing of  $\{\text{Cryptand}(\text{Na}^+)\}\{\text{Sn}^{\text{II}}(\text{Pc}^{\bullet 3-})\}^-$  with  $\text{Ir}_4(\text{CO})_{12}$  deep blue color remained unchanged, and black crystals were obtained after slow mixing with *n*-hexane. However, structure of these crystals was not solved at 100 K completely by the X-ray diffraction analysis due to strong disorder observed even for a slowly cooled crystal. Therefore, we cannot discuss this product.

Salt  $\{\text{Cryptand}(\text{M}^+)\}\{\text{Sn}^{\text{II}}(\text{Pc}^{\bullet 3-})\}^-$  was initially generated in solution for preparation of  $\{\text{Cryptand}(\text{M}^+)\}_2\{\text{Ru}_3(\text{CO})_{10}[\text{Sn}^{\text{II}}(\text{Pc}^{\bullet 3-})_2]^{2-}\cdot 4\text{C}_6\text{H}_4\text{Cl}_2$  ( $\text{M}^+$  is K or Cs).  $\text{Sn}^{\text{II}}\text{Pc}$  (26.6 mg, 0.042 mmol) was reduced by mixture of reductants (potassium graphite ( $\text{KC}_8$ ) (10 mg, 0.148 mmol) and cesium anthracenide (10 mg, 0.032 mmol)) in the presence of one equivalent of Cryptand (16 mg, 0.042 mmol) in 17 ml of *o*-dichlorobenzene during one day at  $60^\circ\text{C}$ . Phthalocyanine completely dissolved to form deep blue solution. It was cooled down to room temperature and filtered into the flask containing half equivalent of 13.4 mg of  $\text{Ru}_3(\text{CO})_{12}$  (0.021 mmol). Solution was stirred for one more day at  $60^\circ\text{C}$  (color of the solution remained unchanged). Solution was cooled down to room temperature and filtered into a tube for diffusion. Crystals precipitated after slow mixing with *n*-hexane during 1.5 months. Solvent was decanted and crystals were washed by *n*-hexane to yield dark black plates with copper lustre characteristic of reduced phthalocyanines. The yield of pure crystals was rather low (only several milligrams). Similarly, we also carried out experiment with a ( $\{\text{Sn}^{\text{II}}(\text{Pc}^{\bullet 3-})\}^-$ :  $\text{Ru}_3(\text{CO})_{12}$ ) = 3:1 ratio but no new crystal phase formed in this case.

For the synthesis of  $(\text{Cp}^*_2\text{Cr}^+)\{\text{Ru}_3(\text{CO})_{11}\cdot\text{Sn}^{\text{II}}(\text{Pc}^{\bullet 3-})\}^-\cdot\text{C}_6\text{H}_4\text{Cl}_2$  (**4**) cluster  $\text{Ru}_3(\text{CO})_{12}$  (26.7 mg, 0.042 mmol) was reduced by slight excess of  $\text{Cp}^*_2\text{Cr}$  (15 mg, 0.046 mmol) in *o*-dichlorobenzene by stirring the solution during one day at 80°C. Color of the solution changed from orange to red-brown and orange powder of  $\text{Ru}_3(\text{CO})_{12}$  dissolved. Obtained solution is filtered into the flask containing half equivalent of  $\text{Sn}^{\text{IV}}\text{Cl}_2\text{Pc}$  (14.7 mg, 0.021 mmol). Solution is stirred at 60°C for one day more to yield deep blue solution. Slow mixing of the obtained solution with *n*-hexane yields black blocks with characteristic for reduced phthalocyanines copper luster. The yield of the crystals is 42%. Testing of the crystals by X-ray diffraction show that only one crystal phase is formed.

When we studied reduction of  $\text{Os}_3(\text{CO})_{12}$  (37.8 mg, 0.042 mmol) by decamethylchromocene (15 mg, 0.046 mmol) no crystals suitable for X-ray diffraction were isolated.<sup>4</sup> However, the interaction of the reduced species with half equivalent of  $\text{Sn}^{\text{IV}}\text{Cl}_2\text{Pc}$  (14.7 mg, 0.021 mmol) by stirring of the solution at 60°C yielded deep blue solution from which slow mixing with *n*-hexane yields black blocks suitable for X-ray structure analysis. Composition of the crystals according to this analysis was  $(\text{Cp}^*_2\text{Cr}^+)\{\text{Os}_3(\text{CO})_{10}\text{Cl}\cdot\text{Sn}^{\text{II}}(\text{Pc}^{\bullet 3-})\}^-\cdot\text{C}_6\text{H}_4\text{Cl}_2$  (**5**). Crystals with characteristic for reduced phthalocyanines copper luster were obtained in 47% yield. Testing of the crystals by X-ray diffraction show that only one crystal phase is formed and these crystals were taken to carry out the study of their optical and magnetic properties.

For synthesis of  $(\text{Cp}^*_2\text{Cr}^+)\{\text{Ir}_4(\text{CO})_{11}\cdot\text{Sn}^{\text{II}}(\text{Pc}^{\bullet 3-})\}_2^-$  (**6**) initially cluster  $\text{Ir}_4(\text{CO})_{12}$  (46.1 mg, 0.042 mmol) was reduced by slight excess of  $\text{Cp}^*_2\text{Cr}$  (15 mg, 0.046 mmol) in *o*-dichlorobenzene by stirring the solution during one day at 80°C. Color of the solution changed to red, and yellow powder of  $\text{Ir}_4(\text{CO})_{12}$  dissolved. In this case obtained solution was filtered into a flask containing half equivalent of  $\text{Sn}^{\text{IV}}\text{Cl}_2\text{Pc}$  (14.7 mg, 0.021 mmol). Solution was stirred for one more day at 60°C to yield deep blue-green solution at complete dissolution of phthalocyanine. Slow mixing of the obtained solution with *n*-hexane yielded small crystals in form of black blocks. Testing of the obtained crystals by X-ray diffraction showed the presence of two phases. New phase (**6**) studied by X-ray diffraction has the  $(\text{Cp}^*_2\text{Cr}^+)\{\text{Ir}_4(\text{CO})_{11}\cdot\text{Sn}^{\text{II}}(\text{Pc}^{\bullet 3-})\}^-$  composition. Second phase according to the unit cell parameters was

previously studied complex of the reduced  $\text{Ir}_4(\text{CO})_{12} - (\text{Cp}^*_2\text{Cr}^+)_2\{\text{Ir}_8(\text{CO})_{18}\}^{2-}$ .<sup>3</sup> Crystals of two phases could not be safely separated due to their small size. Therefore, we present only crystal structure of **6**.

Elemental analysis could not be used to confirm the composition of **2-5** due to extremely high air-sensitivity of obtained crystals. Due to oxidation of  $\text{Pc}^{\bullet 3-}$  in the presence of transition metals, addition of oxygen during the procedure of elemental analysis was observed, which changed the content of elements in the samples. Therefore, their composition was determined from X-ray diffraction on single crystals only.

### X-ray crystal structure determination

X-ray diffraction data for **1-6** are listed in Tables S1 and S2. X-ray diffraction data for **1-6** were collected on an Oxford diffraction "Gemini-R" CCD diffractometer with graphite monochromated  $\text{MoK}_\alpha$  radiation using an Oxford Instrument Cryojet system. Raw data reduction to  $F^2$  was carried out using CrysAlisPro, Oxford Diffraction Ltd. The structures were solved by direct method and refined by the full-matrix least-squares method against  $F^2$  using SHELX-2018/3.<sup>4</sup> Non-hydrogen atoms were anisotropically refined. Positions of hydrogen atoms were included into refinement in a riding model. Crystal structure of **3** contains four independent solvent  $\text{C}_6\text{H}_4\text{Cl}_2$  molecules. Three of them are ordered whereas the fourth molecule is strongly disordered. This molecule was masked by standard SQUEEZE procedure. 340 electrons were found in a volume of  $1388 \text{ \AA}^3$  in 5 voids per unit cell. This is consistent with the presence of one additional  $[\text{C}_6\text{H}_4\text{Cl}_2]$  molecule per asymmetric unit cell (totally four molecules were found). There is disorder of the  $\text{Os}_3(\text{CO})_{10}\text{Cl}$  cluster in **5**. The  $\text{Os}(\text{CO})_3$  fragment which is involved in the formation of the Os-Sn bond at such disorder is ordered but disorder is observed for two osmium atoms with surrounding ligands which do not participate in the Os-Sn bonding (the occupancy factors for disordered cluster are 0.8887(6)/0.1113(6)). Crystal structure of **6** contains only half independent  $\text{Cp}^*_2\text{Cr}^+$  cation per one independent  $\{\text{Ir}_4(\text{CO})_{11} \cdot \text{Sn}^{\text{II}}(\text{Pc}^{\bullet 3-})\}_2$  unit providing unusual  $(\text{Cp}^*_2\text{Cr}^+)\{\text{Ir}_4(\text{CO})_{11} \cdot \text{Sn}^{\text{II}}(\text{Pc}^{\bullet 3-})\}_2^-$  composition of **6**.

**Table S1.** Crystallographic data and some details of data collection and refinement for **1-3**.

| Compound                                                                                                           | <b>1</b>                                                                          | <b>2</b>                                                                                | <b>3</b>                                                                                                                |
|--------------------------------------------------------------------------------------------------------------------|-----------------------------------------------------------------------------------|-----------------------------------------------------------------------------------------|-------------------------------------------------------------------------------------------------------------------------|
| Empirical formula                                                                                                  | C <sub>43</sub> H <sub>16</sub> Co <sub>4</sub> N <sub>8</sub> O <sub>11</sub> Sn | C <sub>61</sub> H <sub>52</sub> N <sub>10</sub> NaO <sub>17</sub> Ru <sub>3</sub><br>Sn | C <sub>134</sub> H <sub>120</sub> Cl <sub>8</sub> CsKN <sub>20</sub> O <sub>22</sub><br>Ru <sub>3</sub> Sn <sub>2</sub> |
| M <sub>r</sub> [g·mol <sup>-1</sup> ]                                                                              | 1175.05                                                                           | 1642.01                                                                                 | 3358.69                                                                                                                 |
| Crystal color and shape,                                                                                           | Dark black prism                                                                  | Dark black block                                                                        | Dark black plate                                                                                                        |
| Crystal system                                                                                                     | monoclinic                                                                        | monoclinic                                                                              | orthorhombic                                                                                                            |
| Space group                                                                                                        | <i>P</i> 2 <sub>1</sub> /n                                                        | <i>P</i> 2 <sub>1</sub> /n                                                              | <i>P</i> na2 <sub>1</sub>                                                                                               |
| <i>a</i> , Å                                                                                                       | 12.9161(1)                                                                        | 17.3563(8)                                                                              | 26.2701(4)                                                                                                              |
| <i>b</i> , Å                                                                                                       | 30.5606(3)                                                                        | 14.6148(7)                                                                              | 22.9467(5)                                                                                                              |
| <i>c</i> , Å                                                                                                       | 10.9495(1)                                                                        | 25.1980(12)                                                                             | 22.6093(3)                                                                                                              |
| $\alpha$ , °                                                                                                       | 90                                                                                | 90                                                                                      | 90                                                                                                                      |
| $\beta$ , °                                                                                                        | 107.391(1)                                                                        | 96.146(1)                                                                               | 90                                                                                                                      |
| $\gamma$ , °                                                                                                       | 90                                                                                | 90                                                                                      | 90                                                                                                                      |
| <i>V</i> , Å <sup>3</sup>                                                                                          | 4124.45(7)                                                                        | 6355.0(5)                                                                               | 13629.2(4)                                                                                                              |
| <i>Z</i>                                                                                                           | 4                                                                                 | 4                                                                                       | 4                                                                                                                       |
| $\rho_{\text{calc}}$ [g/cm <sup>3</sup> ]                                                                          | 1.892                                                                             | 1.716                                                                                   | 1.637                                                                                                                   |
| $\mu$ [mm <sup>-1</sup> ]                                                                                          | 2.247                                                                             | 1.173                                                                                   | 1.213                                                                                                                   |
| <i>F</i> (000)                                                                                                     | 2304                                                                              | 3268                                                                                    | 6728                                                                                                                    |
| <i>T</i> [K]                                                                                                       | 110(2)                                                                            | 293(2)                                                                                  | 101(2)                                                                                                                  |
| 2 $\theta$ , °                                                                                                     | 56.560                                                                            | 60.434                                                                                  | 59.320                                                                                                                  |
| Reflns measured                                                                                                    | 45931                                                                             | 69976                                                                                   | 121049                                                                                                                  |
| Unique reflns                                                                                                      | 9908                                                                              | 17737                                                                                   | 29927                                                                                                                   |
| Params/Restraints                                                                                                  | 604/242                                                                           | 838/0                                                                                   | 1576/1575                                                                                                               |
| Reflns [ <i>F</i> <sub>o</sub> >2 $\sigma$ ( <i>F</i> <sub>o</sub> )]                                              | 8775                                                                              | 14674                                                                                   | 22777                                                                                                                   |
| <i>R</i> <sub>1</sub> [ <i>F</i> <sub>o</sub> >2 $\sigma$ ( <i>F</i> <sub>o</sub> )]/ <i>wR</i> <sub>2</sub> (all) | 0.0223/0.0550                                                                     | 0.0368/0.0961                                                                           | 0.0882/0.2455                                                                                                           |
| G.O.F                                                                                                              | 1.041                                                                             | 1.168                                                                                   | 1.038                                                                                                                   |
| CCDC number                                                                                                        | 2115713                                                                           | 2115714                                                                                 | 2115717                                                                                                                 |

**Table S2.** Crystallographic data and some details of data collection and refinement for **4-6**.

| Compound                                                                                                  | <b>4</b>                                                                                               | <b>5</b>                                                                                               | <b>6</b>                                                                                             |
|-----------------------------------------------------------------------------------------------------------|--------------------------------------------------------------------------------------------------------|--------------------------------------------------------------------------------------------------------|------------------------------------------------------------------------------------------------------|
| Empirical formula                                                                                         | C <sub>69</sub> H <sub>50</sub> Cl <sub>2</sub> CrN <sub>8</sub> O <sub>11</sub><br>Ru <sub>3</sub> Sn | C <sub>68</sub> H <sub>50</sub> Cl <sub>3</sub> CrN <sub>8</sub> O <sub>10</sub><br>Os <sub>3</sub> Sn | C <sub>53</sub> H <sub>31</sub> Cr <sub>0.50</sub> Ir <sub>4</sub> N <sub>8</sub> O <sub>11</sub> Sn |
| M <sub>r</sub> [g·mol <sup>-1</sup> ]                                                                     | 1711.97                                                                                                | 1986.80                                                                                                | 1869.35                                                                                              |
| Crystal color and shape,                                                                                  | Dark black prism                                                                                       | Dark black block                                                                                       | Dark black block                                                                                     |
| Crystal system                                                                                            | Monoclinic                                                                                             | monoclinic                                                                                             |                                                                                                      |
| Space group                                                                                               | <i>P</i> 2 <sub>1</sub> /n                                                                             | <i>P</i> 2 <sub>1</sub> /n                                                                             |                                                                                                      |
| <i>a</i> , Å                                                                                              | 16.7801(1)                                                                                             | 16.8961(4)                                                                                             | 23.9498(5)                                                                                           |
| <i>b</i> , Å                                                                                              | 20.0593(1)                                                                                             | 20.0969(4)                                                                                             | 15.1713(2)                                                                                           |
| <i>c</i> , Å                                                                                              | 19.7671(1)                                                                                             | 19.6999(4)                                                                                             | 14.5364(4)                                                                                           |
| <i>α</i> , °                                                                                              | 90                                                                                                     | 90                                                                                                     | 90                                                                                                   |
| <i>β</i> , °                                                                                              | 94.8720(10)                                                                                            | 96.102(2)                                                                                              | 97.584(2)                                                                                            |
| <i>γ</i> , °                                                                                              | 90                                                                                                     | 90                                                                                                     | 90                                                                                                   |
| <i>V</i> , Å <sup>3</sup>                                                                                 | 6629.51(6)                                                                                             | 6651.4(2)                                                                                              | 5235.6(2)                                                                                            |
| <i>Z</i>                                                                                                  | 4                                                                                                      | 4                                                                                                      | 4                                                                                                    |
| ρ <sub>calc</sub> [g/cm <sup>3</sup> ]                                                                    | 1.715                                                                                                  | 1.984                                                                                                  | 2.372                                                                                                |
| μ [mm <sup>-1</sup> ]                                                                                     | 1.346                                                                                                  | 6.424                                                                                                  | 10.768                                                                                               |
| <i>F</i> (000)                                                                                            | 3392                                                                                                   | 3788                                                                                                   | 3452                                                                                                 |
| <i>T</i> [K]                                                                                              | 120(2)                                                                                                 | 130(2)                                                                                                 | 130(2)                                                                                               |
| 2θ, °                                                                                                     | 70.500                                                                                                 | 52.744                                                                                                 | 65.814                                                                                               |
| Reflns measured                                                                                           | 68094                                                                                                  | 90186                                                                                                  | 32472                                                                                                |
| Unique reflns                                                                                             | 28227                                                                                                  | 13587                                                                                                  | 16896                                                                                                |
| Params/Restraints                                                                                         | 866/0                                                                                                  | 819/0                                                                                                  | 705/367                                                                                              |
| Reflns [ <i>F</i> <sub>o</sub> >2σ( <i>F</i> <sub>o</sub> )]                                              | 23076                                                                                                  | 12022                                                                                                  | 14494                                                                                                |
| <i>R</i> <sub>1</sub> [ <i>F</i> <sub>o</sub> >2σ( <i>F</i> <sub>o</sub> )]/ <i>wR</i> <sub>2</sub> (all) | 0.0267/0.0603                                                                                          | 0.0448/0.1130                                                                                          | 0.0568/0.1376                                                                                        |
| G.O.F                                                                                                     | 1.046                                                                                                  | 1.031                                                                                                  | 1.096                                                                                                |
| CCDC number                                                                                               | 2115715                                                                                                | 2115716                                                                                                | 2115712                                                                                              |



**Table S3.** IR spectra of starting compounds and complexes **1-3**.

| Components                                    | Sn <sup>II</sup> (Pc <sup>2-</sup> )                                                                                                                           | Co <sub>4</sub> (CO) <sub>12</sub>                                                        | {(Co <sub>4</sub> (CO) <sub>11</sub> ·Sn <sup>II</sup> (Pc <sup>2-</sup> ))<br>(1)}                                                                      | Cryptand<br>[2.2.2]                                                                                                                                                                | Ru <sub>3</sub> (CO) <sub>12</sub>                              | {Cryptand(Na <sup>+</sup> )}·<br>{Ru <sub>3</sub> (CO) <sub>11</sub> ·<br>Sn <sup>II</sup> (Pc <sup>3-</sup> )} <sup>-</sup> (2)                                    | {Cryptand(M <sup>+</sup> ) <sub>2</sub><br>{Ru <sub>3</sub> (CO) <sub>10</sub><br>·[Sn <sup>II</sup> (Pc <sup>3-</sup> ) <sub>2</sub> ] <sup>2-</sup><br>·4C <sub>6</sub> H <sub>4</sub> Cl <sub>2</sub> (3)} |
|-----------------------------------------------|----------------------------------------------------------------------------------------------------------------------------------------------------------------|-------------------------------------------------------------------------------------------|----------------------------------------------------------------------------------------------------------------------------------------------------------|------------------------------------------------------------------------------------------------------------------------------------------------------------------------------------|-----------------------------------------------------------------|---------------------------------------------------------------------------------------------------------------------------------------------------------------------|---------------------------------------------------------------------------------------------------------------------------------------------------------------------------------------------------------------|
| Sn <sup>II</sup> (Pc <sup>2-</sup> )          | 435w<br>498w<br>725m<br>745m<br>768m<br>819w<br>872w<br>887m<br>948w<br>1059s<br>1072s<br>1114s<br>1156w<br>1283m<br>1329s<br>1407w<br>1454w<br>1486s<br>3049w |                                                                                           | -<br>506w*<br>725s<br>750m<br>775m<br>825w<br>876w<br>892w<br>956w<br>-<br>1078m<br>1121s<br>1164w<br>1289w<br>1333s<br>1420w<br>1460w<br>1478w<br>3057w |                                                                                                                                                                                    |                                                                 | 440w*<br>501w<br>712m<br>747m*<br>765w<br>823w<br>-<br>881w<br>950w<br>-<br>1088s<br>1115s*<br>1165w<br>1263w<br>1328m*<br>1421w<br>1461m*<br>1497w*<br>3057w       | 440w<br>502w<br>713s<br>748m*<br>763m<br>822w<br>-<br>889w<br>944m*<br>1064m*<br>-<br>1112vs<br>1164w<br>1260w<br>1330m*<br>1420m<br>1464m*<br>1496w*<br>3051w                                                |
| Cation <sup>+</sup>                           |                                                                                                                                                                |                                                                                           |                                                                                                                                                          | 476w<br>528w<br>581w<br>735m<br>922m<br>948w<br>982m<br>1038w<br>1071m<br>1100s<br>1127s<br>1213w<br>1295m<br>1329m<br>1360s<br>1446m<br>1462m<br>1490w<br>2790w<br>2877w<br>2943w |                                                                 | 481w<br>-<br>567s*<br>747m*<br>928w<br>-<br>-<br>1038m<br>1072m<br>1103s<br>1115s*<br>-<br>1301w<br>1328m*<br>1356w<br>-<br>1461m*<br>1497w*<br>-<br>2922w<br>2967w | -<br>-<br>569m*<br>748m*<br>915w<br>944m*<br>-<br>1033w*<br>1064m*<br>-<br>1112vs*<br>-<br>1298m<br>1330m*<br>1353w<br>-<br>1464m*<br>1496w*<br>2813w<br>2876m<br>2956w                                       |
| Transition metal cluster                      |                                                                                                                                                                | 422w<br>482w<br>510w<br>527w<br>545w<br>801w<br>1020w<br>1099w<br>1852s<br>2026s<br>2054s | -<br>484w<br>506w*<br>530w<br>544w<br>798w<br>1020w<br>-<br>1822m 1832m<br>1974m 1990m<br>2020s 2038s<br>2076s                                           |                                                                                                                                                                                    | 448w<br>466w<br>546m<br>576m<br>592m<br>1997s<br>2023s<br>2059s | 440w*<br>465w<br>-<br>567s<br>-<br>1988s 2000s<br>2031s<br>2080m                                                                                                    | 440w<br>463w<br>-<br>569m*<br>591w<br>1963vs 1997vs<br>2029m<br>2193m                                                                                                                                         |
| C <sub>6</sub> H <sub>4</sub> Cl <sub>2</sub> |                                                                                                                                                                |                                                                                           |                                                                                                                                                          |                                                                                                                                                                                    |                                                                 |                                                                                                                                                                     | 658w<br>1033w*<br>-                                                                                                                                                                                           |

\*- bands coincide; w – weak intensity, m –middle intensity, s – strong intensity; vs- very strong

**Table S4.** IR spectra of starting compounds and coordination complexes **4** and **5**.

| Components                                               | Sn <sup>II</sup> (Pc <sup>2-</sup> )                                                                                                                           | Cp* <sub>2</sub> Cr                                                                                                      | Ru <sub>3</sub> (CO) <sub>12</sub>                                        | {Cp* <sub>2</sub> Cr <sup>+</sup> }·<br>{Ru <sub>3</sub> (CO) <sub>11</sub> ·<br>Sn <sup>II</sup> (Pc <sup>*3-</sup> ) <sup>-</sup> ·<br>C <sub>6</sub> H <sub>4</sub> Cl <sub>2</sub> ( <b>4</b> ) | Os <sub>3</sub> (CO) <sub>12</sub>                                                                      | {Cp* <sub>2</sub> Cr <sup>+</sup> }·<br>{Ru <sub>3</sub> (CO) <sub>10</sub> Cl<br>·Sn <sup>II</sup> (Pc <sup>*3-</sup> ) <sup>-</sup> ·<br>C <sub>6</sub> H <sub>4</sub> Cl <sub>2</sub> ( <b>5</b> ) |
|----------------------------------------------------------|----------------------------------------------------------------------------------------------------------------------------------------------------------------|--------------------------------------------------------------------------------------------------------------------------|---------------------------------------------------------------------------|-----------------------------------------------------------------------------------------------------------------------------------------------------------------------------------------------------|---------------------------------------------------------------------------------------------------------|-------------------------------------------------------------------------------------------------------------------------------------------------------------------------------------------------------|
| Sn <sup>II</sup> (Pc <sup>2-</sup> )                     | 435w<br>498w<br>725m<br>745m<br>768m<br>819w<br>872w<br>887m<br>948w<br>1059s<br>1072s<br>1114s<br>1156w<br>1283m<br>1329s<br>1407w<br>1454w<br>1486s<br>3049w |                                                                                                                          |                                                                           | 434w<br>500w<br>716s<br>745m<br>763s<br>825w<br>-<br>884w<br>948w<br>-<br>1082w*<br>1113s<br>1164m<br>-<br>1327m<br>1421w*<br>1457w*<br>1470w<br>3057w                                              |                                                                                                         | 434w<br>494m*<br>713s<br>748s<br>764s<br>826w<br>-<br>885w<br>948w<br>-<br>1084m*<br>1113s<br>1164m<br>-<br>1327m<br>1418m*<br>1455w*<br>1472w<br>3057w                                               |
| Cation <sup>+</sup>                                      |                                                                                                                                                                | 419w<br>585w<br>1022s<br>1068w<br>1262w<br>1316s<br>1375s<br>1414w<br>1423m<br>1448w<br>1634m<br>2852w<br>2899w<br>2955w |                                                                           | -<br>566s*<br>1021w<br>1082w*<br>-<br>1303w<br>1383m<br>-<br>1421w*<br>1433w<br>-<br>2852w<br>2920w<br>-<br>-                                                                                       |                                                                                                         | -<br>569m<br>1022w<br>1084m*<br>-<br>1305w<br>1382m<br>-<br>1418m*<br>1435w<br>-<br>2855w<br>2919w                                                                                                    |
| Transition metal cluster                                 |                                                                                                                                                                |                                                                                                                          | -<br>448w<br>466w<br>-<br>546m<br>576m<br>592m<br>1997s<br>2023s<br>2059s | -<br>450w<br>461w<br>-<br>-<br>566s*<br>-<br>1978s 1990s<br>2001s 2012s<br>2033s 2082m                                                                                                              | 410w<br>431w<br>463w<br>496w<br>563w<br>584m<br>604m<br>1984s 1994s<br>2016s 2028s 2040s<br>2060s 2068s | 406w<br>427w<br>453w<br>494m*<br>-<br>591s<br>618w<br>1963s 2006s<br>2040s 2063s<br>2100s                                                                                                             |
| Solvent<br>C <sub>6</sub> H <sub>4</sub> Cl <sub>2</sub> |                                                                                                                                                                |                                                                                                                          |                                                                           | 658w<br>1033w*<br>1457w*                                                                                                                                                                            |                                                                                                         | 657w<br>1034w<br>1455w*                                                                                                                                                                               |

\* - bands are coincided; w – weak intensity, m –middle intensity, s – strong intensity

IR spectra of starting compounds and coordination complexes with clusters.

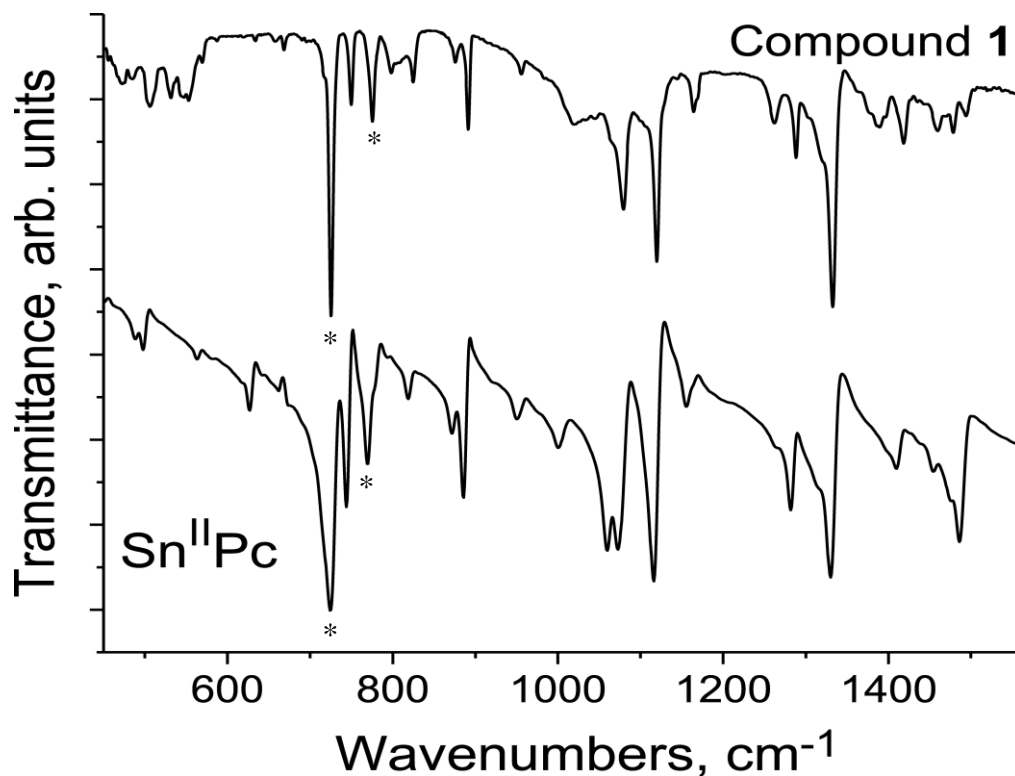

**Figure S1.** IR spectra of starting tin(II) phthalocyanine [Sn<sup>II</sup>(Pc<sup>2-</sup>)]<sup>0</sup> and coordination complex {Co<sub>4</sub>(CO)<sub>11</sub>·Sn<sup>II</sup>(Pc<sup>2-</sup>)} (**1**) in KBr pellets. Pellet for **1** was prepared in anaerobic conditions.

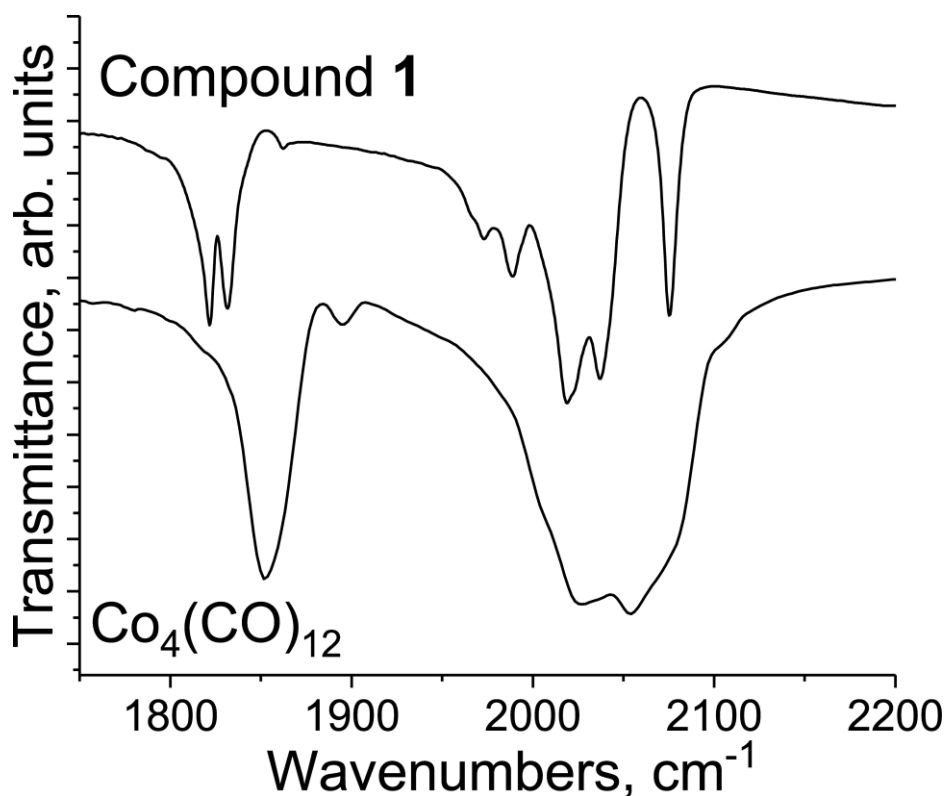

**Figure S2.** IR spectra in the range of the C≡O vibrations for starting Co<sub>4</sub>(CO)<sub>12</sub> cluster and coordination complex {Co<sub>4</sub>(CO)<sub>11</sub>·Sn<sup>II</sup>(Pc<sup>2-</sup>)} (**1**) in KBr pellets prepared in anaerobic conditions.

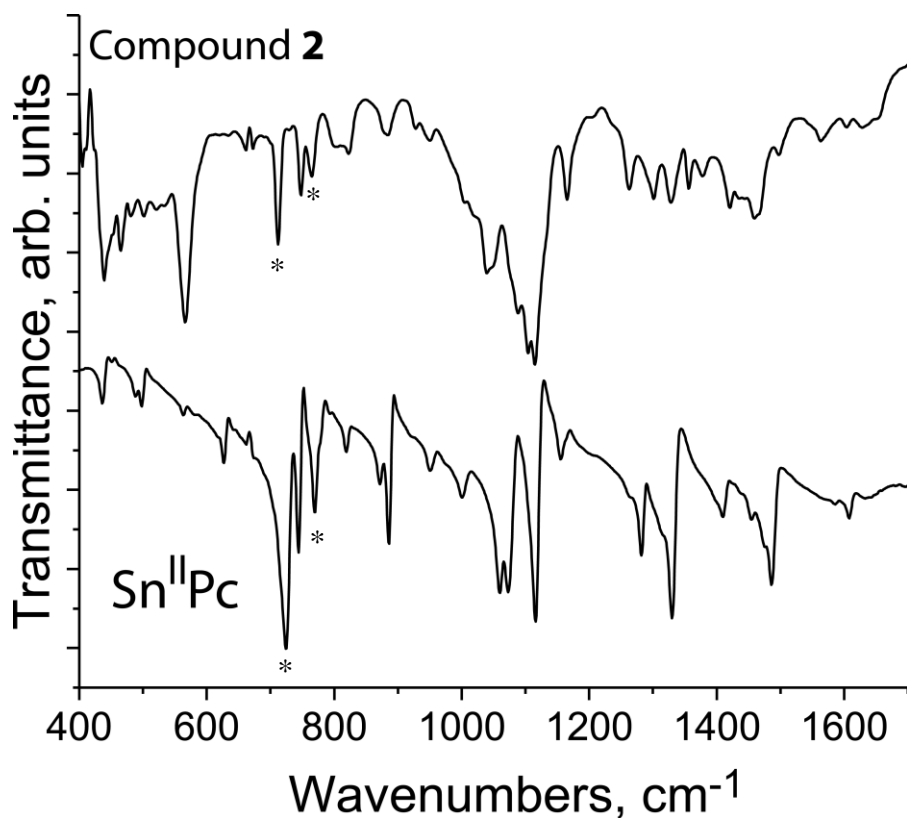

**Figure S3.** IR spectra of starting tin(II) phthalocyanine  $[\text{Sn}^{\text{II}}(\text{Pc}^{2-})]^0$  and coordination complex  $\{\text{Cryptand}(\text{Na}^+)\}\{\text{Ru}_3(\text{CO})_{11}\cdot\text{Sn}^{\text{II}}(\text{Pc}^{3-})\}^-$  (**2**) in KBr pellets. Pellet for **2** was prepared in anaerobic conditions.

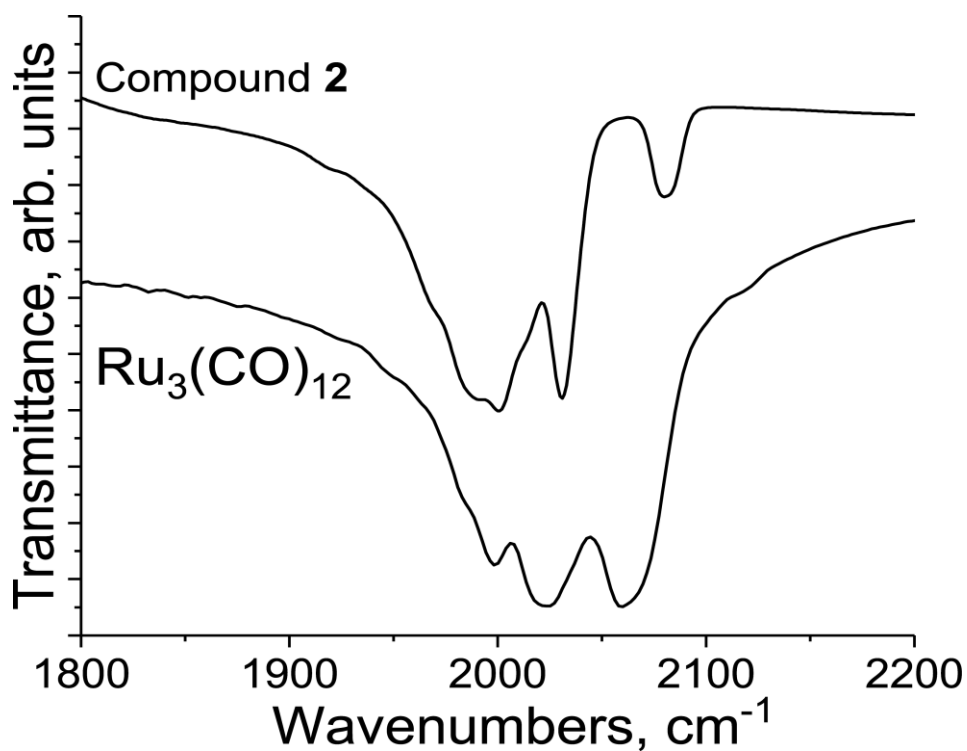

**Figure S4.** IR spectra in the range of the C≡O vibrations for starting  $\text{Ru}_3(\text{CO})_{12}$  cluster and coordination complex  $\{\text{Cryptand}(\text{Na}^+)\}\{\text{Ru}_3(\text{CO})_{11}\cdot\text{Sn}^{\text{II}}(\text{Pc}^{3-})\}^-$  (**2**) in KBr pellets prepared in anaerobic conditions.

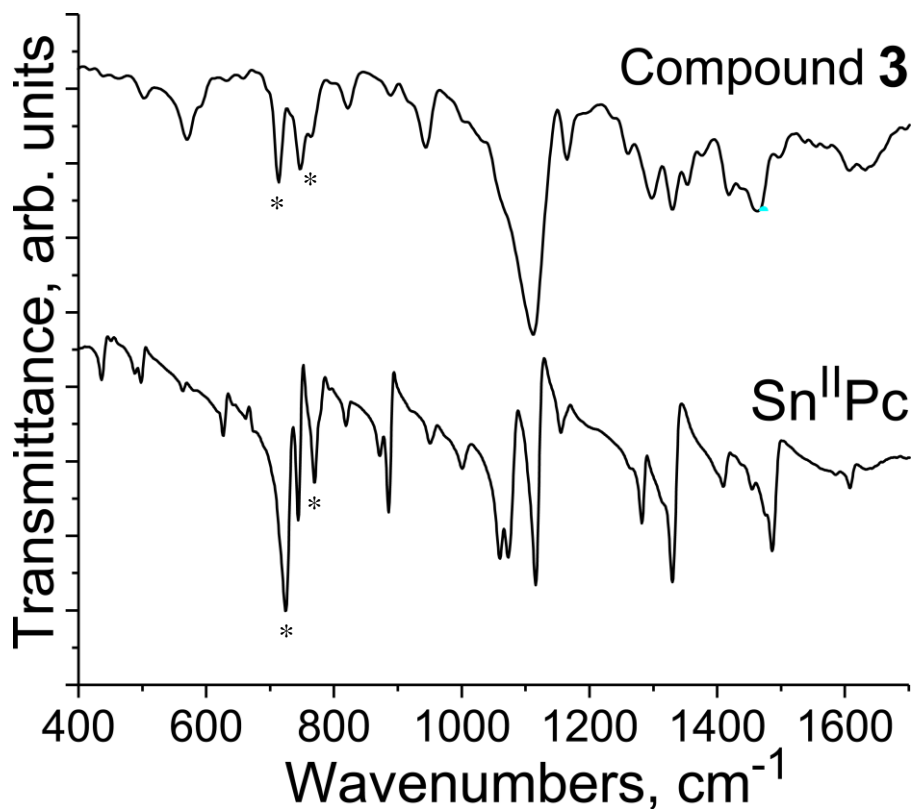

**Figure S5.** IR spectra of starting tin(II) phthalocyanine  $[\text{Sn}^{\text{II}}(\text{Pc}^{2-})]^0$  and coordination complex  $\{\text{Cryptand}(\text{M}^+)\}_2\{\text{Ru}_3(\text{CO})_{10}\cdot[\text{Sn}^{\text{II}}(\text{Pc}^{\bullet 3-})]_2\}^{2-}\cdot 4\text{C}_6\text{H}_4\text{Cl}_2$  (**3**) in KBr pellets. Pellet for **3** was prepared in anaerobic conditions.

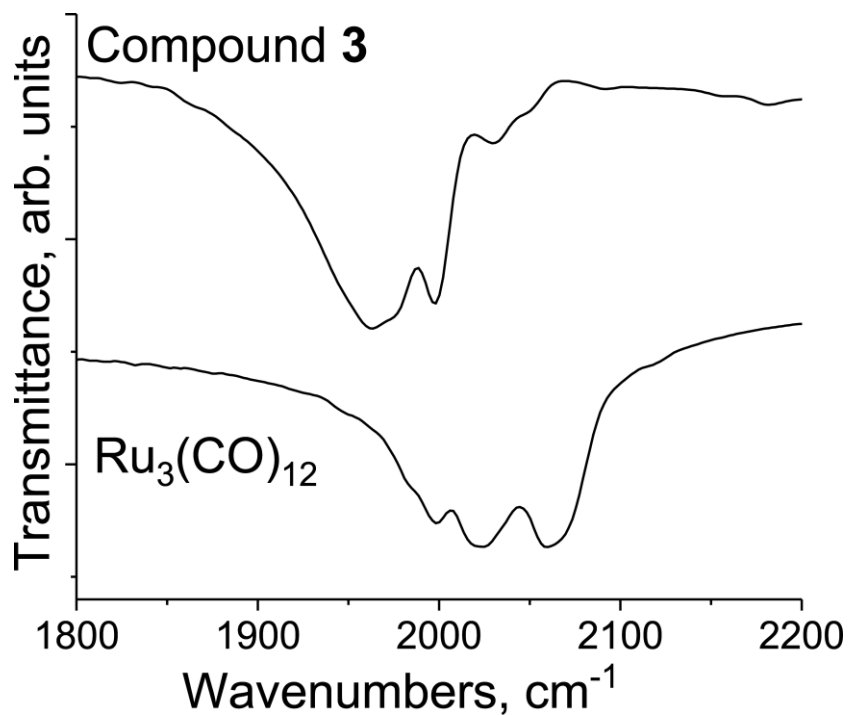

**Figure S6.** IR spectra in the range of the  $\text{C}\equiv\text{O}$  vibrations for starting  $\text{Ru}_3(\text{CO})_{12}$  cluster and coordination complex  $\{\text{Cryptand}(\text{M}^+)\}_2\{\text{Ru}_3(\text{CO})_{10}\cdot[\text{Sn}^{\text{II}}(\text{Pc}^{\bullet 3-})]_2\}^{2-}\cdot 4\text{C}_6\text{H}_4\text{Cl}_2$  (**3**) in KBr pellets prepared in anaerobic conditions.

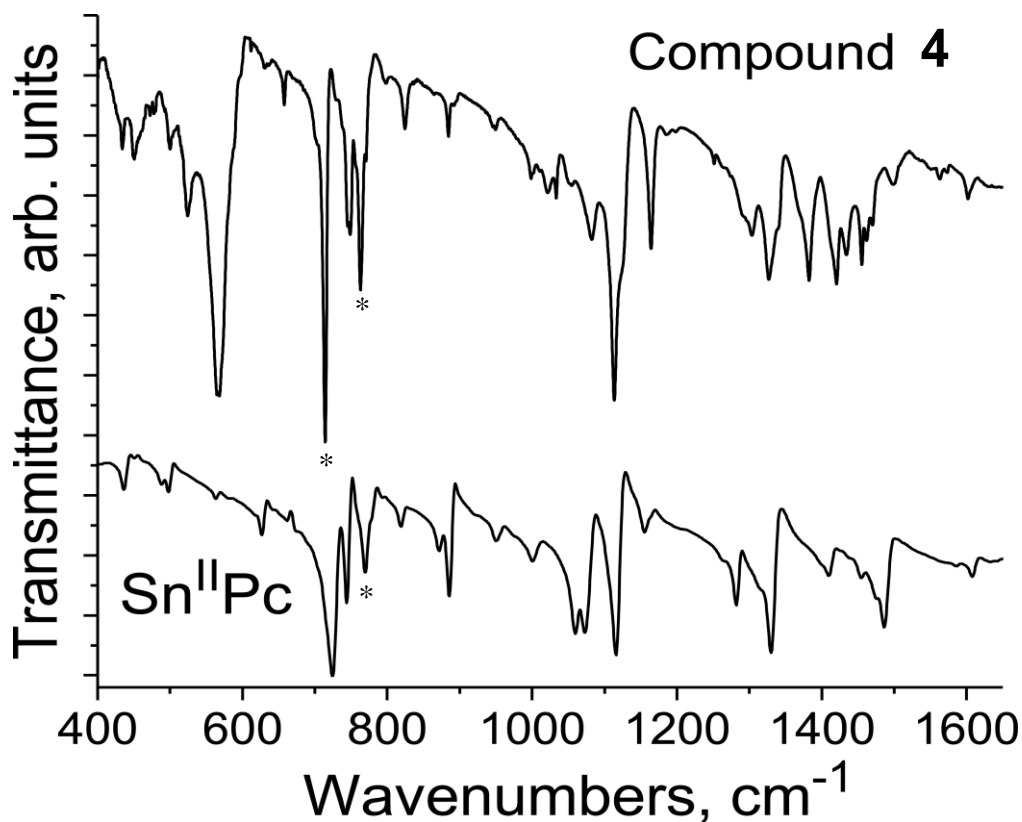

**Figure S7.** IR spectra of starting tin(II) phthalocyanine [Sn<sup>II</sup>(Pc<sup>2-</sup>)]<sup>0</sup> and coordination complex {Cp\*<sub>2</sub>Cr<sup>+</sup>}{Ru<sub>3</sub>(CO)<sub>11</sub>·Sn<sup>II</sup>(Pc<sup>3-</sup>)}<sup>-</sup>·C<sub>6</sub>H<sub>4</sub>Cl<sub>2</sub> (**4**) in KBr pellets. Pellet for **4** was prepared in anaerobic conditions.

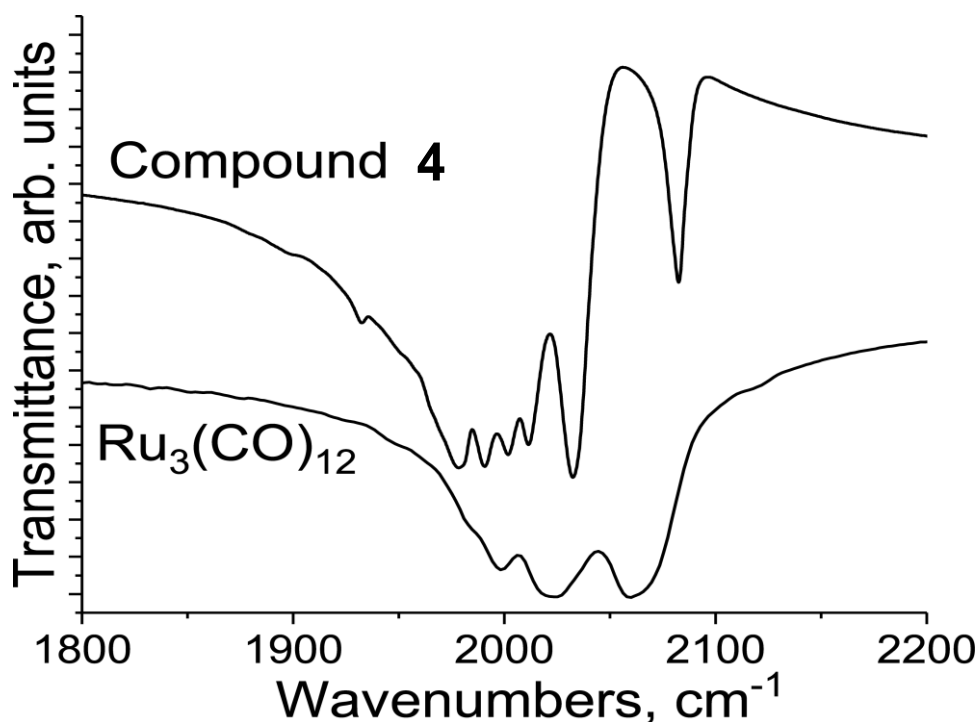

**Figure S8.** IR spectra in the range of the C≡O vibrations for starting Ru<sub>3</sub>(CO)<sub>12</sub> cluster and coordination complex {Cp\*<sub>2</sub>Cr<sup>+</sup>}{Ru<sub>3</sub>(CO)<sub>11</sub>·Sn<sup>II</sup>(Pc<sup>3-</sup>)}<sup>-</sup>·C<sub>6</sub>H<sub>4</sub>Cl<sub>2</sub> (**4**) in KBr pellets prepared in anaerobic conditions.

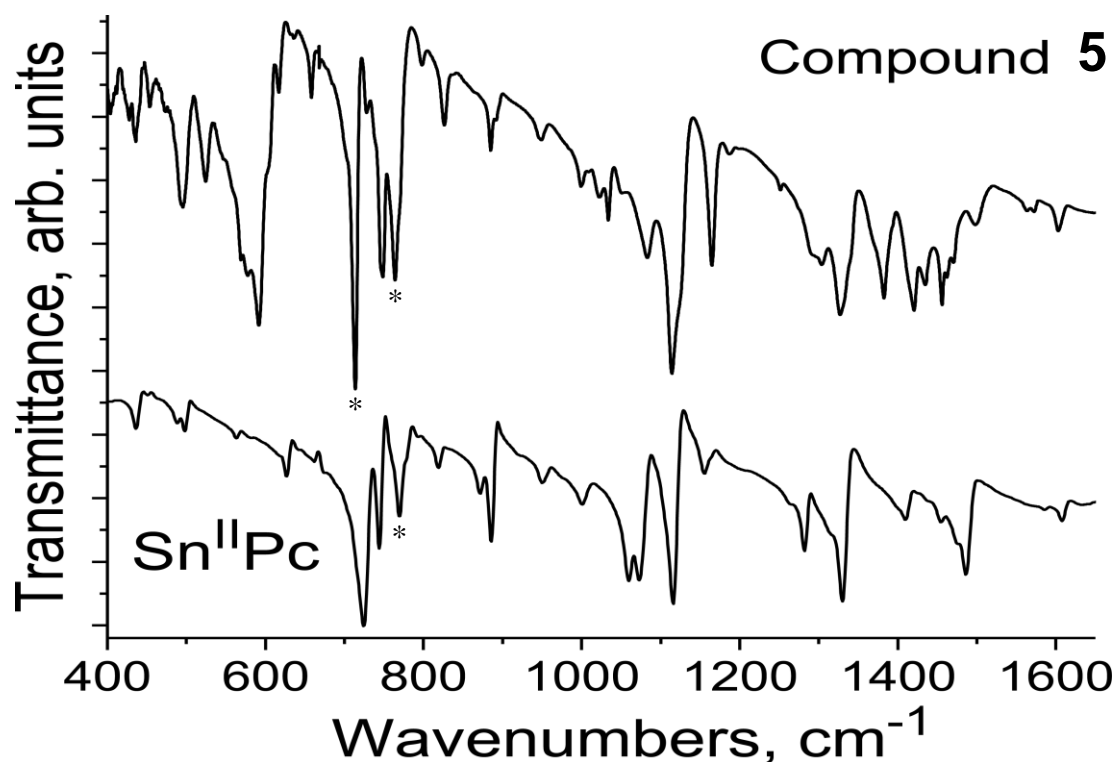

**Figure S9.** IR spectra of starting tin(II) phthalocyanine [Sn<sup>II</sup>(Pc<sup>2-</sup>)]<sup>0</sup> and coordination complex {Cp\*<sub>2</sub>Cr<sup>+</sup>}·{Os<sub>3</sub>(CO)<sub>10</sub>Cl·Sn<sup>II</sup>(Pc<sup>3-</sup>)}<sup>-</sup>·C<sub>6</sub>H<sub>4</sub>Cl<sub>2</sub> (**5**) in KBr pellets. Pellet for **5** was prepared in anaerobic conditions.

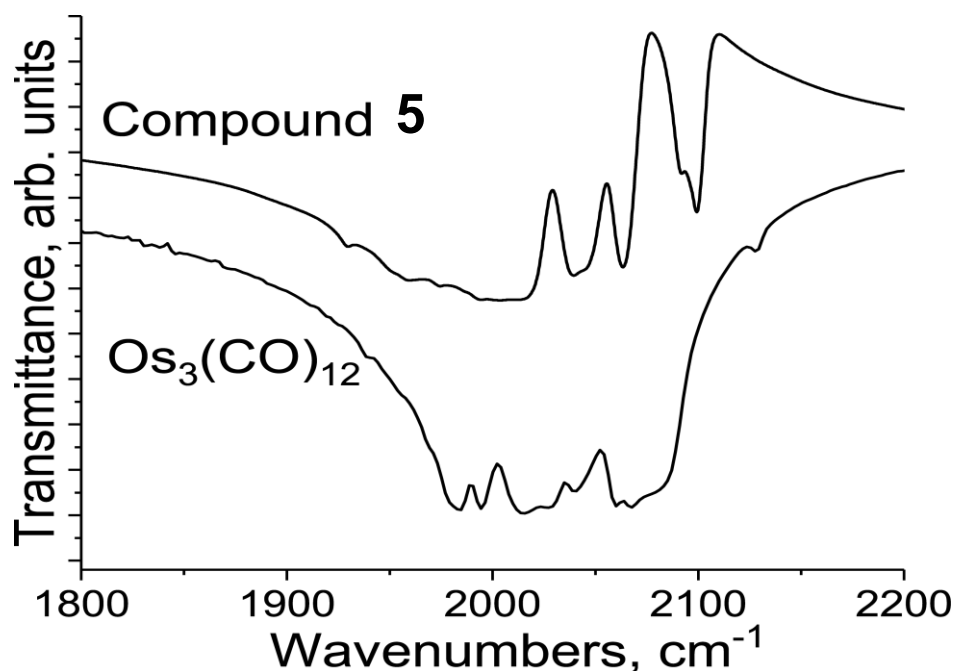

**Figure S10.** IR spectra in the range of the C≡O vibrations for starting Os<sub>3</sub>(CO)<sub>12</sub> cluster and coordination complex (Cp\*<sub>2</sub>Cr<sup>+</sup>)·{Os<sub>3</sub>(CO)<sub>10</sub>Cl·Sn<sup>II</sup>(Pc<sup>3-</sup>)}<sup>-</sup>·C<sub>6</sub>H<sub>4</sub>Cl<sub>2</sub> (**5**) in KBr pellets prepared in anaerobic conditions.

### Crystal structures.

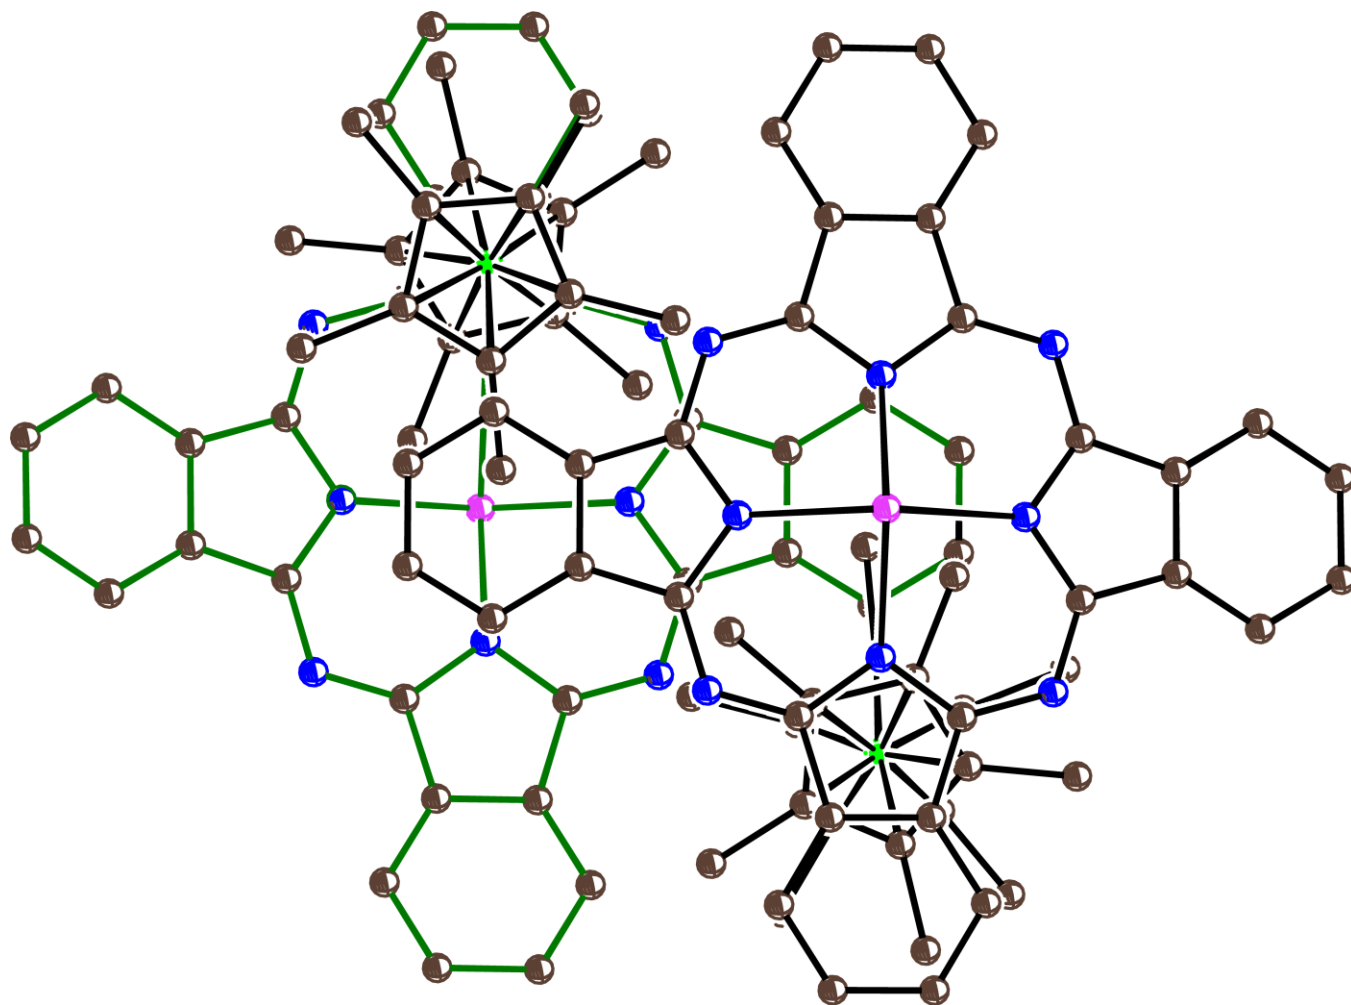

**Figure S11.** View on one  $(\text{Cp}^*_2\text{Cr}^+)_2\{\text{Ru}_3(\text{CO})_{11}\cdot\text{Sn}^{\text{II}}(\text{Pc}^{\bullet 3-})\}^-_2$  unit in the crystal structure of  $\{\text{Cp}^*_2\text{Cr}^+\}\{\text{Ru}_3(\text{CO})_{11}\cdot\text{Sn}^{\text{II}}(\text{Pc}^{\bullet 3-})\}^- \cdot \text{C}_6\text{H}_4\text{Cl}_2$  (**4**) along the  $\text{Cp}^*_2\text{Cr}^+$  cations.  $\text{Ru}_3(\text{CO})_{11}$  clusters are not shown for clarity. Bonds of far  $\{\text{Sn}^{\text{II}}(\text{Pc}^{\bullet 3-})\}^-$  anion within the unit are shown by dark green color.



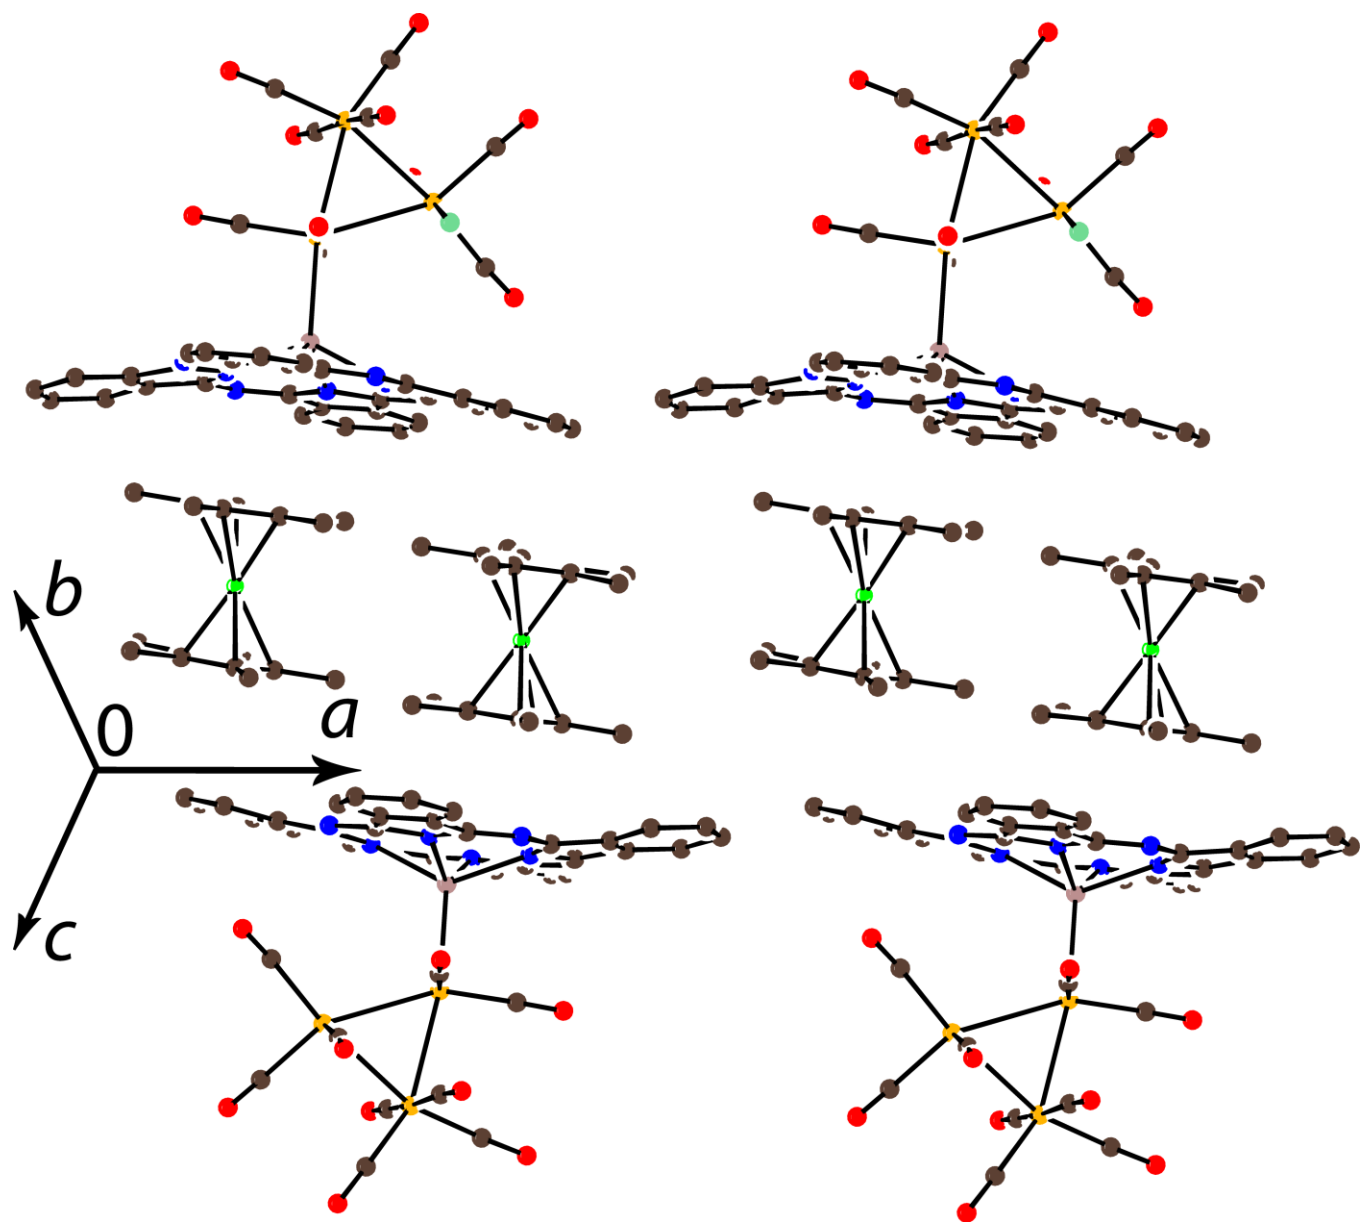

**Figure S12.** View on the crystal structure of complex  $\{\text{Cp}^*_2\text{Cr}^+\}\{\text{Os}_3(\text{CO})_{10}\text{Cl}\cdot\text{Sn}^{\text{II}}(\text{Pc}^{\bullet 3-})\} \cdot \text{C}_6\text{H}_4\text{Cl}_2$

(5). Solvent molecules are not shown. Only one orientation of the  $\text{Os}_3(\text{CO})_{10}\text{Cl}$  cluster is shown.

### UV-visible-NIR spectra

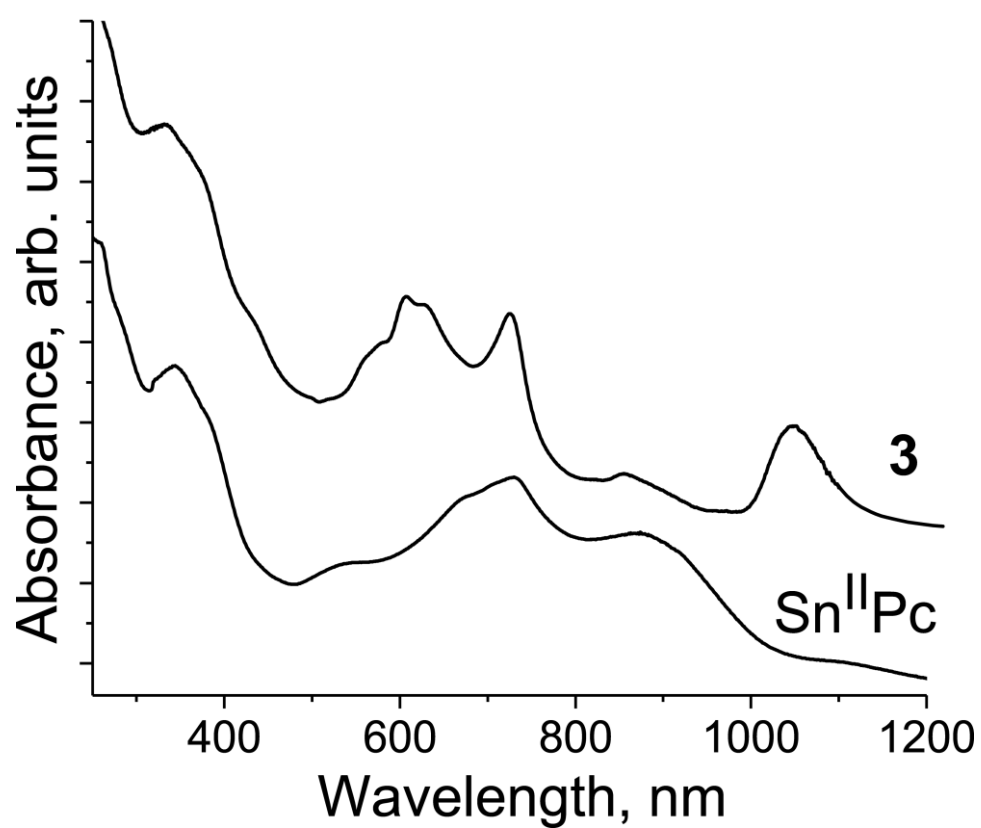

**Figure S13.** UV-visible-NIR spectra of pristine  $\text{Sn}^{\text{II}}(\text{Pc}^{2-})$  and complex  $\{\text{Cryptand}(\text{M}^+)\}_2\{\text{Ru}_3(\text{CO})_{10}[\text{Sn}^{\text{II}}(\text{Pc}^{\bullet 3-})]_2\}^{2-}\cdot 4\text{C}_6\text{H}_4\text{Cl}_2$  (**3**) ( $\text{M} = \text{K}, \text{Cs}$ ) containing radical trianion  $\text{Pc}^{\bullet 3-}$  macrocycles.

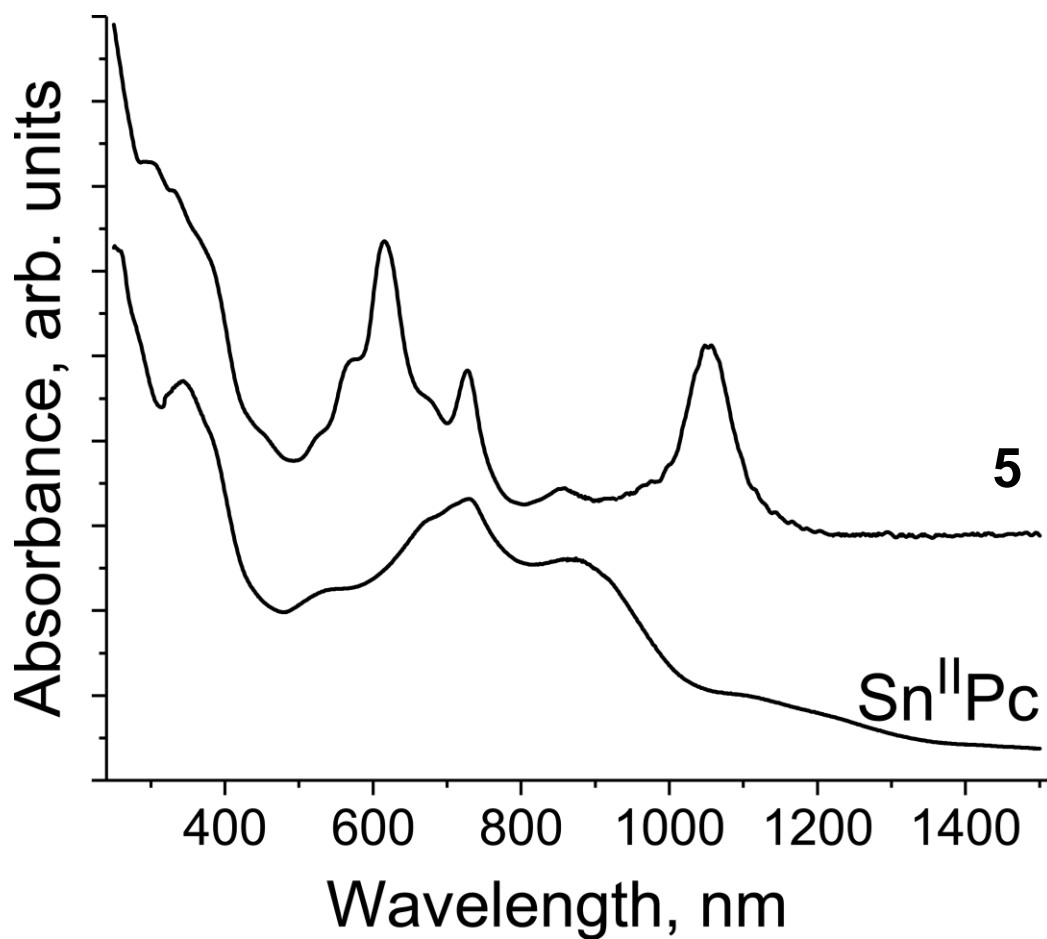

**Figure S14.** UV-visible-NIR spectra of pristine  $\text{Sn}^{\text{II}}(\text{Pc}^{2-})$  and complex  $\{\text{Cp}^*\text{Cr}^+\}\{\text{Os}_3(\text{CO})_{10}\text{Cl}\cdot\text{Sn}^{\text{II}}(\text{Pc}^{\bullet 3-})\}^- \cdot \text{C}_6\text{H}_4\text{Cl}_2$  (**5**) containing radical trianion  $\text{Pc}^{\bullet 3-}$  macrocycles.

## Magnetic data

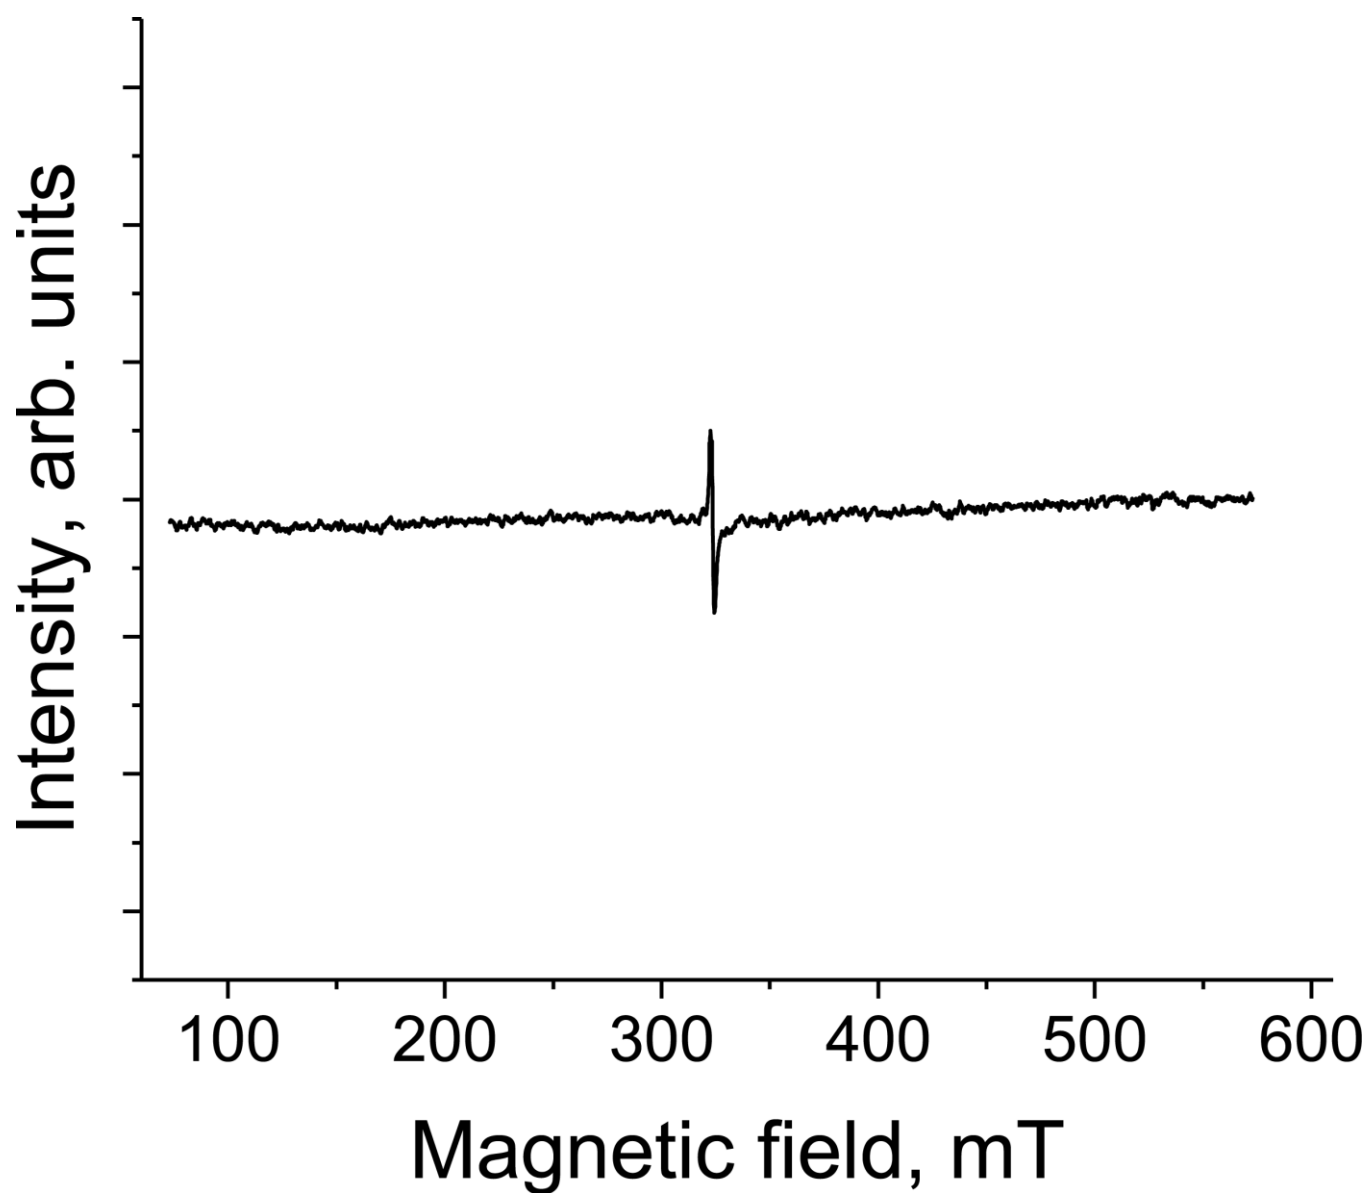

**Figure S15.** EPR spectrum of  $\{(\text{Co}_4(\text{CO})_{11} \cdot \text{Sn}^{\text{II}}(\text{Pc}^{2-}))\}$  (**1**) at 70 K and large amplification of the signal.

Integral intensity of a weak signal at about 323 mT corresponds to less than 0.1% from the content of SnPc.

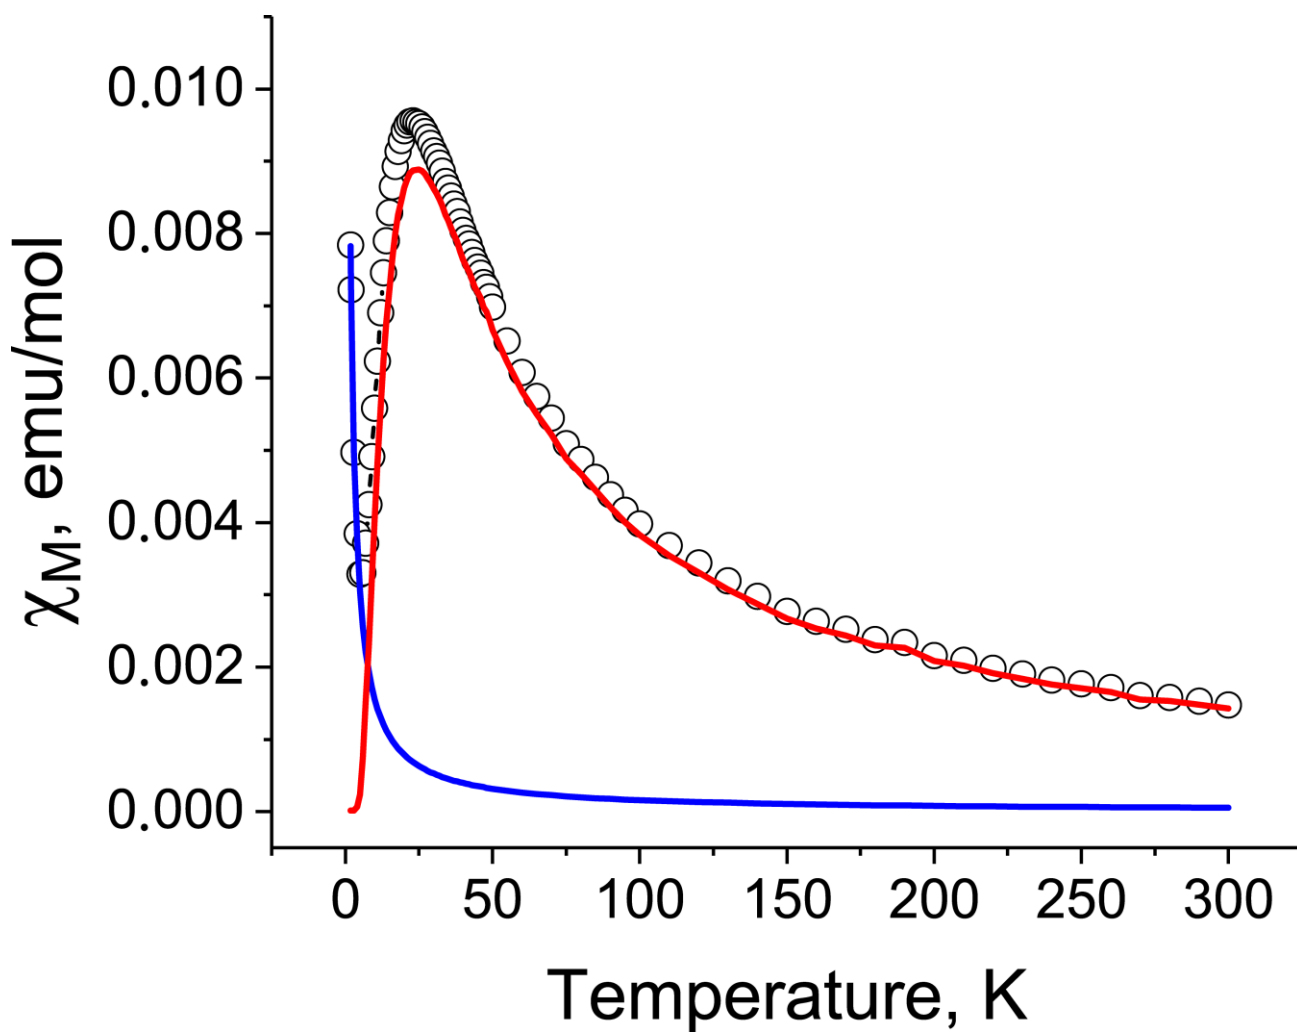

**Figure S16.** Experimental data of molar magnetic susceptibility of complex  $\{\text{Cryptand}(\text{Na}^+)\}\{\text{Ru}_3(\text{CO})_{11}\cdot\text{Sn}^{\text{II}}(\text{Pc}^{\bullet 3-})\}^-$  (**2**) (open circles) and approximation of the data by two contributions: from Curie impurities with  $C = 0.0133$  (3.6% of the  $S = 1/2$  spins from total amount of  $\{\text{Sn}^{\text{II}}(\text{Pc}^{\bullet 3-})\}^-$ , blue curve) and bulk sample (red curve).

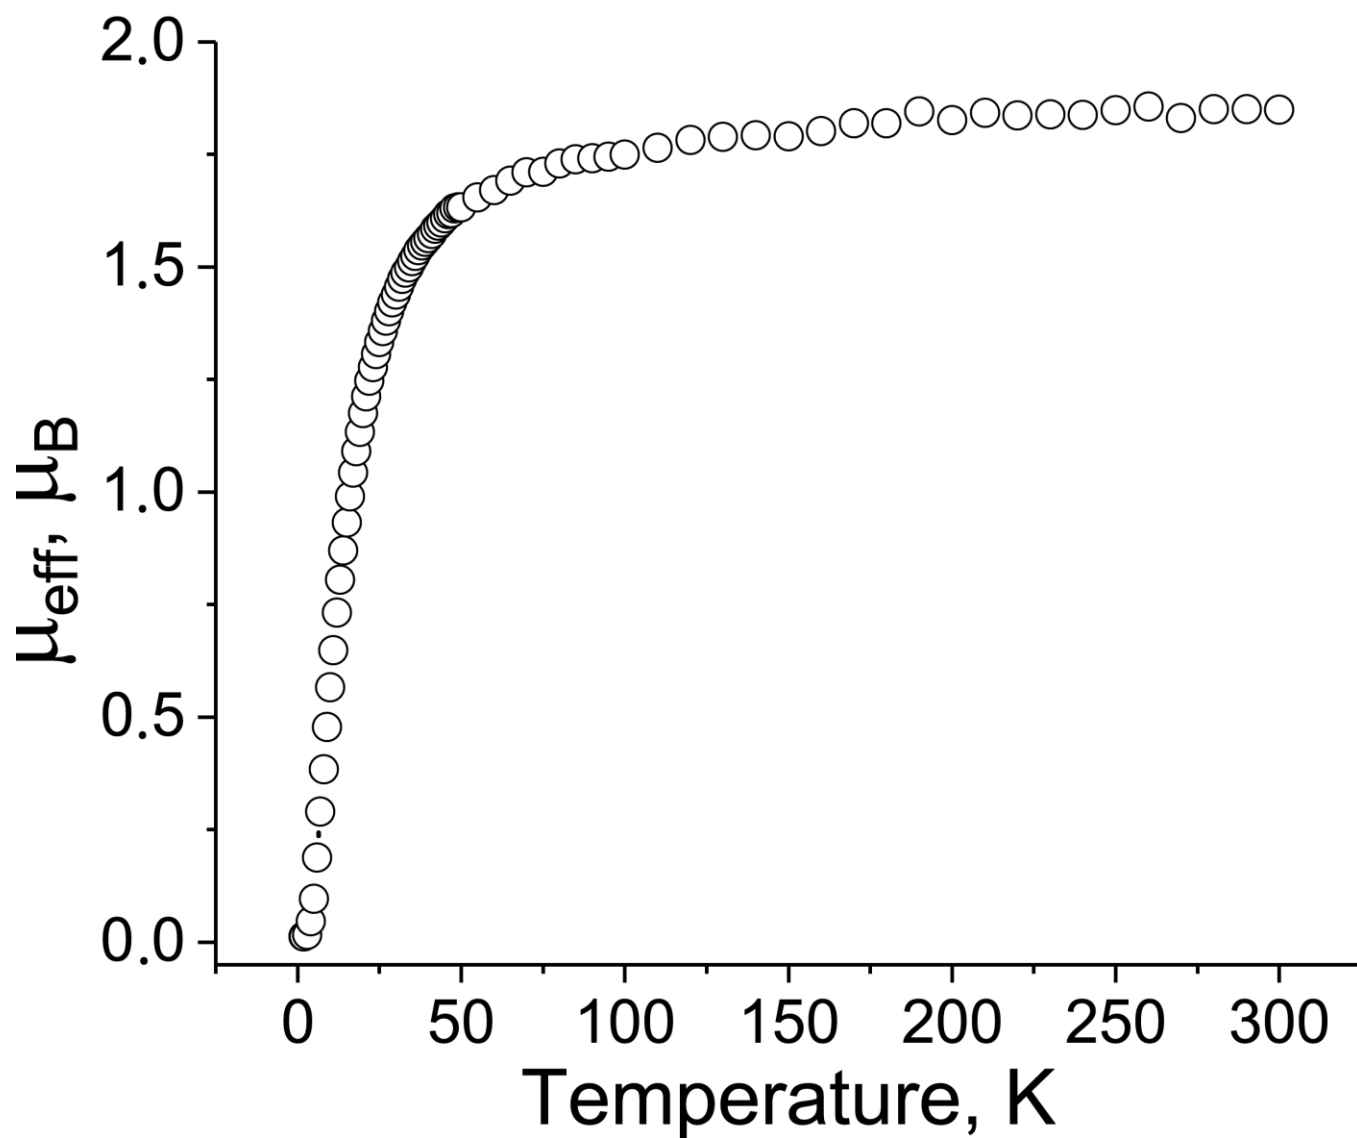

**Figure S17.** Temperature dependence of effective magnetic moment of complex  $\{\text{Cryptand}(\text{Na}^+)\}\{\text{Ru}_3(\text{CO})_{11}\cdot\text{Sn}^{\text{II}}(\text{Pc}^{\bullet 3-})\}^-$  (**2**) in the 1.9-300 K range.

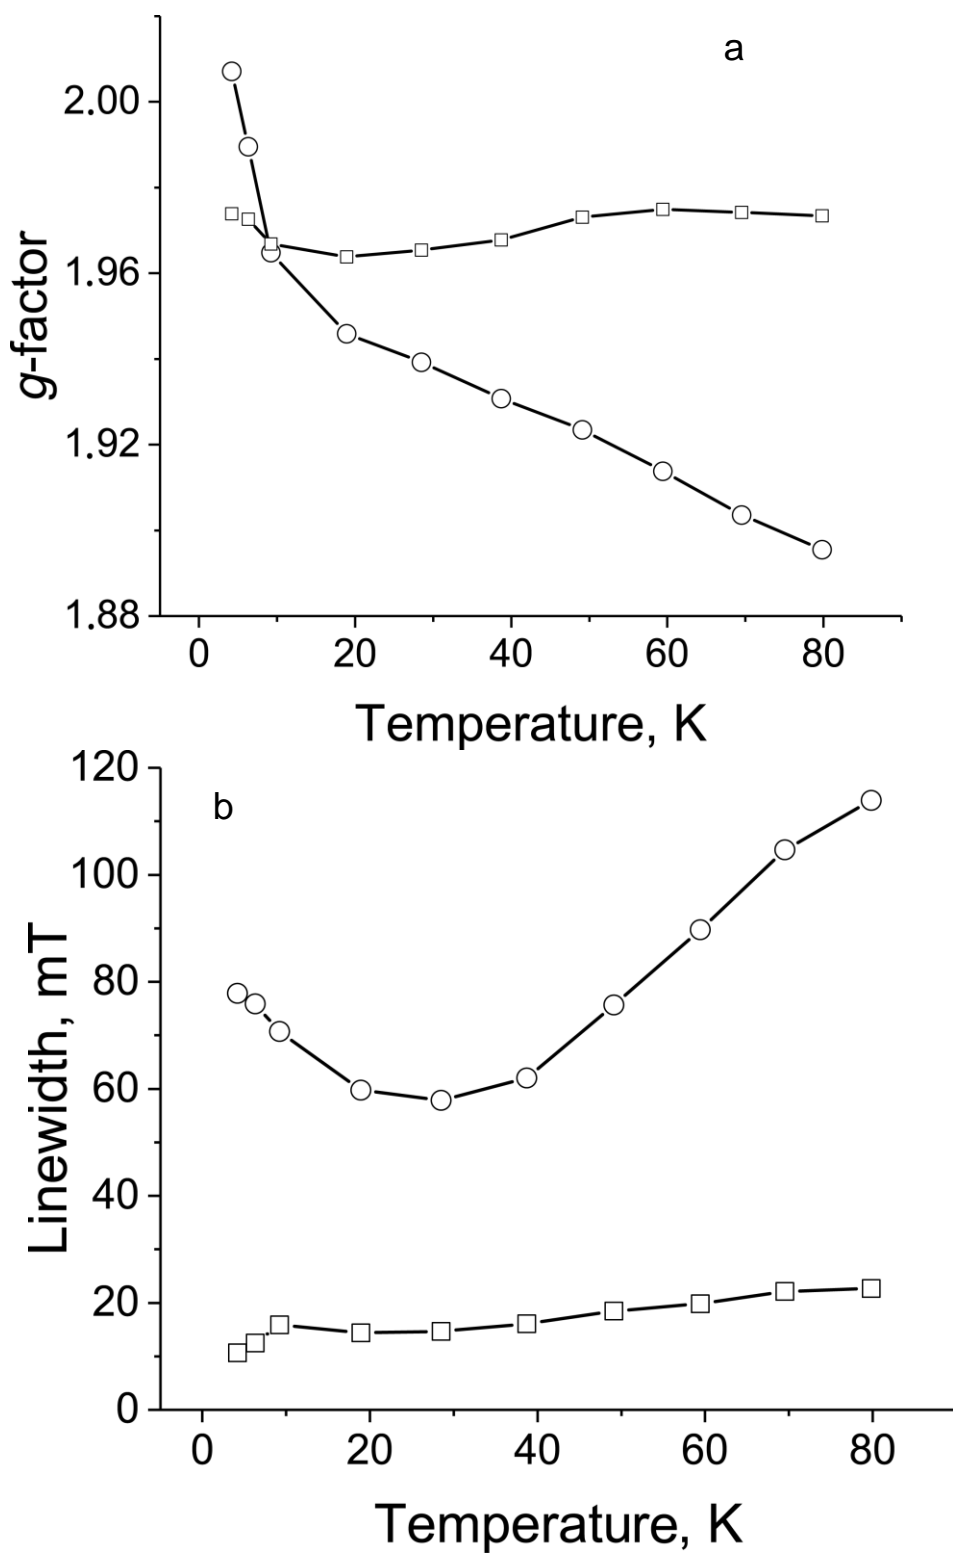

**Fig. S18.** Temperature dependencies of the parameter of broad EPR signal in **2** from 80 down to 4.2 K:

(a)  $g$ -factor and (b) the linewidth.

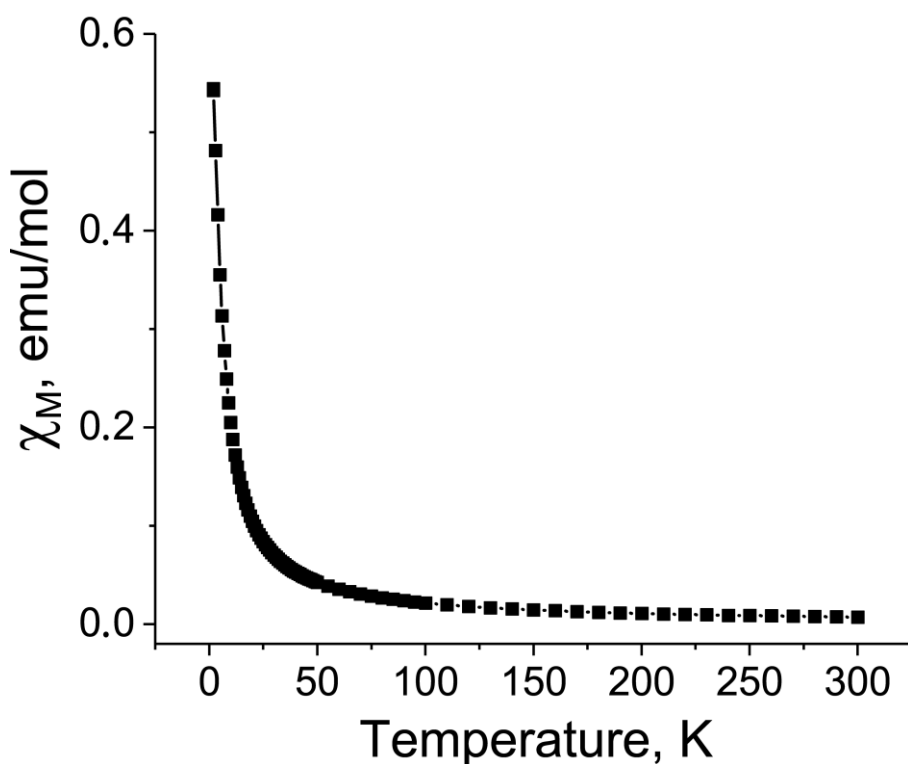

**Figure S19.** Temperature dependence of molar magnetic susceptibility of  $\{\text{Cp}^*_2\text{Cr}^+\}\{\text{Ru}_3(\text{CO})_{11}\cdot\text{Sn}^{\text{II}}(\text{Pc}^{\bullet 3-})\}^- \cdot \text{C}_6\text{H}_4\text{Cl}_2$  (**4**).

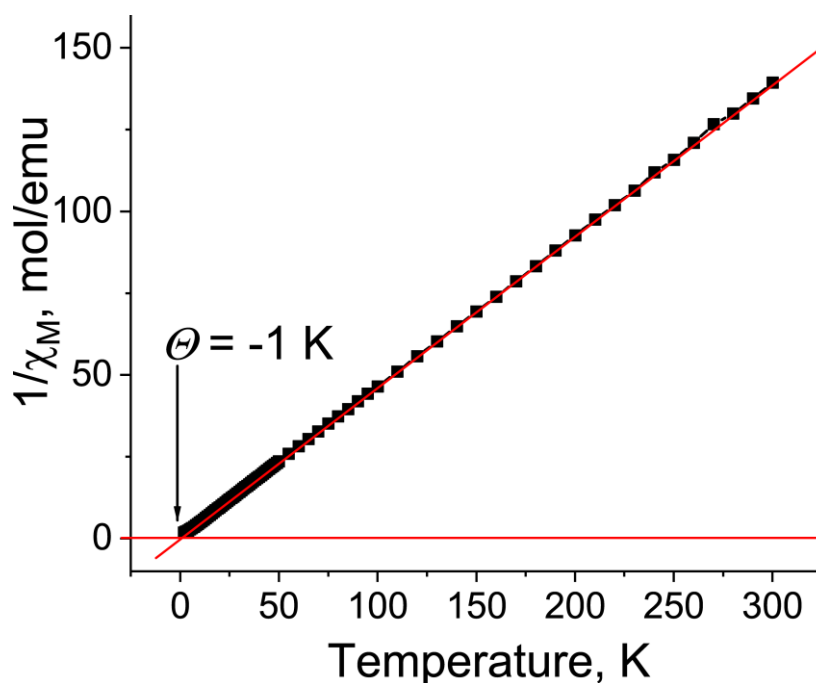

**Figure S20.** Temperature dependence of reciprocal molar magnetic susceptibility of  $\{\text{Cp}^*_2\text{Cr}^+\}\{\text{Ru}_3(\text{CO})_{11}\cdot\text{Sn}^{\text{II}}(\text{Pc}^{\bullet 3-})\}^- \cdot \text{C}_6\text{H}_4\text{Cl}_2$  (**4**) which allows Weiss temperature to be determined as -1 K.



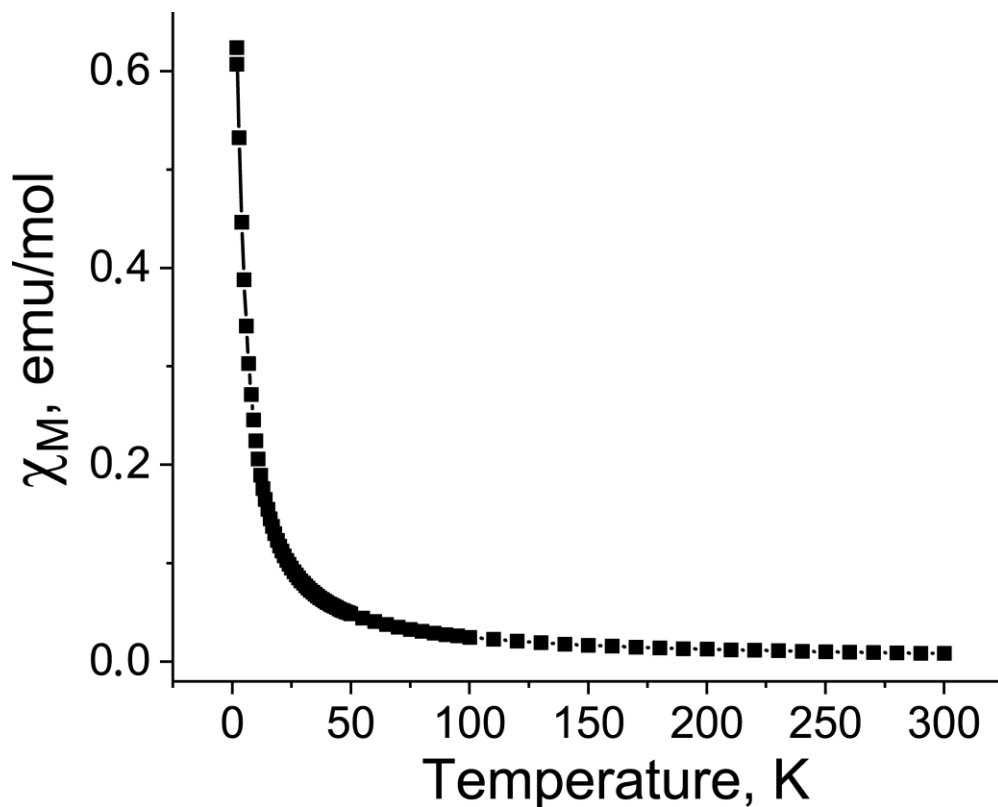

**Figure S21.** Temperature dependence of molar magnetic susceptibility of  $\{\text{Cp}^*_2\text{Cr}^+\}\{\text{Os}_3(\text{CO})_{10}\text{Cl}\cdot\text{Sn}^{\text{II}}(\text{Pc}^{\bullet 3-})\}^- \cdot \text{C}_6\text{H}_4\text{Cl}_2$  (**5**).

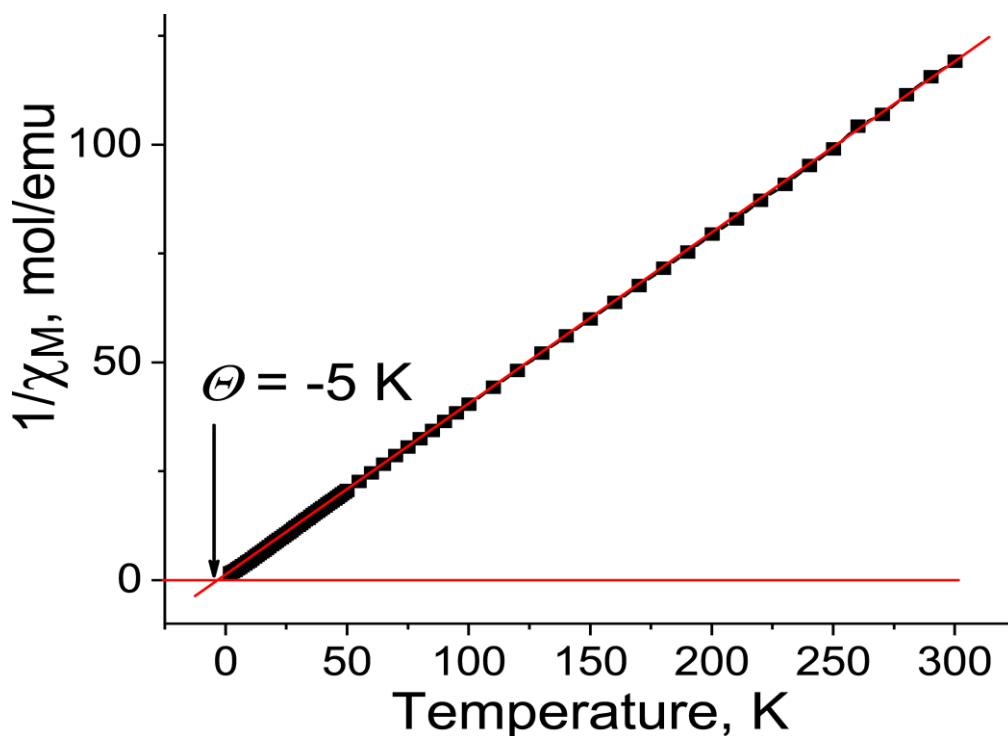

**Figure S22.** Temperature dependence of reciprocal molar magnetic susceptibility of  $\{\text{Cp}^*_2\text{Cr}^+\}\{\text{Os}_3(\text{CO})_{10}\text{Cl}\cdot\text{Sn}^{\text{II}}(\text{Pc}^{\bullet 3-})\}^- \cdot \text{C}_6\text{H}_4\text{Cl}_2$  (**5**) which allows Weiss temperature to be determined as -5 K.

## Theoretical calculations.

### Computational

DFT calculations based on the MN12-L<sup>5</sup>, MN12-SX<sup>6</sup>, and CAM-B3LYP-D3(BJ)<sup>7</sup> functionals were performed using the cc-pVTZ-PP,<sup>8</sup> cc-pVTZ,<sup>9</sup> and cc-pVDZ<sup>10</sup> basis sets for Sn, Co, and the other atoms, respectively. Partial geometry optimizations on the coordinates of only hydrogen atoms based on the X-ray structure were performed with “Opt = Tight” keyword. In the present calculations, “Int = SuperFineGrid” was specified, and stabilities of the wave functions were confirmed by specifying the “Stable = Opt” keyword. The subsequent natural bond orbital (NBO) analysis was performed using the NBO program.<sup>11</sup> The computations were performed with the Gaussian 09 program package.<sup>12</sup>

**Table S5.** Method, state, total and relative energy ( $E$  and  $\Delta E$ ), and  $\langle S^2 \rangle$  value of  $\{\text{Co}_4(\text{CO})_{11}\text{Sn}^{\text{II}}(\text{Pc}^{2-})\}$  calculated at the MN12-L, MN12-SX, and CAM-B3LYP-D3(BJ)/cc-pVTZ-PP/cc-pVTZ/cc-pVDZ levels of theory.

| Method            | State          | $E$ / hartree | $\Delta E$ / K | $\langle S^2 \rangle$ |
|-------------------|----------------|---------------|----------------|-----------------------|
| UMN12-L           | <sup>5</sup> A | -8654.6306887 | 29049          | 6.061                 |
| UMN12-L           | <sup>3</sup> A | -8654.6803389 | 13371          | 2.023                 |
| RMN12-L           | <sup>1</sup> A | -8654.7226823 | 0              | 0                     |
| UMN12-L           | <sup>1</sup> A | -8654.7226823 | 0              | 0                     |
| UMN12-SX          | <sup>5</sup> A | -8655.8955931 | 21970          | 6.398                 |
| UMN12-SX          | <sup>3</sup> A | -8655.9284202 | 11604          | 2.916                 |
| RMN12-SX          | <sup>1</sup> A | -8655.9651682 | 0              | 0                     |
| UMN12-SX          | <sup>1</sup> A | -8655.9701447 | -1571          | 0.903                 |
| UCAM-B3LYP-D3(BJ) | <sup>5</sup> A | -8658.9100981 | 11230          | 6.801                 |
| UCAM-B3LYP-D3(BJ) | <sup>3</sup> A | -8658.9404017 | 1661           | 3.576                 |
| RCAM-B3LYP-D3(BJ) | <sup>1</sup> A | -8658.9456615 | 0              | 0                     |
| UCAM-B3LYP-D3(BJ) | <sup>1</sup> A | -8658.9691797 | -7426          | 1.589                 |

**Table S6.** Natural charge and spin densities on Sn atom, Pc and Co<sub>4</sub>(CO)<sub>11</sub> moieties in the <sup>1</sup>A, <sup>3</sup>A, and <sup>5</sup>A states of {Co<sub>4</sub>(CO)<sub>11</sub>·Sn<sup>II</sup>(Pc<sup>2-</sup>)} calculated at the MN12-L, MN12-SX, and CAM-B3LYP-D3(BJ)/cc-pVTZ-PP/cc-pVTZ/cc-pVDZ levels of theory.

|                                    | <sup>1</sup> A |        | <sup>3</sup> A |        | <sup>5</sup> A |        |
|------------------------------------|----------------|--------|----------------|--------|----------------|--------|
|                                    | charge         | spin   | charge         | spin   | charge         | spin   |
| MN12-L                             |                |        |                |        |                |        |
| Sn                                 | 2.057          | 0      | 2.053          | 0.012  | 2.053          | 0.017  |
| Pc                                 | -1.036         | 0      | -1.022         | 1.984  | -1.025         | 1.993  |
| Co <sub>4</sub> (CO) <sub>11</sub> | -1.022         | 0      | -1.031         | 0.004  | -1.027         | 1.991  |
| MN12-SX                            |                |        |                |        |                |        |
| Sn                                 | 2.061          | -0.022 | 2.057          | -0.014 | 2.063          | -0.005 |
| Pc                                 | -1.079         | -0.006 | -1.065         | 1.983  | -1.060         | 1.979  |
| Co <sub>4</sub> (CO) <sub>11</sub> | -0.982         | 0.028  | -0.992         | 0.031  | -1.003         | 2.026  |
| CAM-B3LYP-D3(BJ)                   |                |        |                |        |                |        |
| Sn                                 | 2.005          | -0.040 | 2.001          | -0.031 | 1.996          | -0.019 |
| Pc                                 | -1.053         | -0.012 | -1.038         | 1.979  | -1.027         | 1.984  |
| Co <sub>4</sub> (CO) <sub>11</sub> | -0.952         | 0.051  | -0.964         | 0.053  | -0.969         | 2.036  |

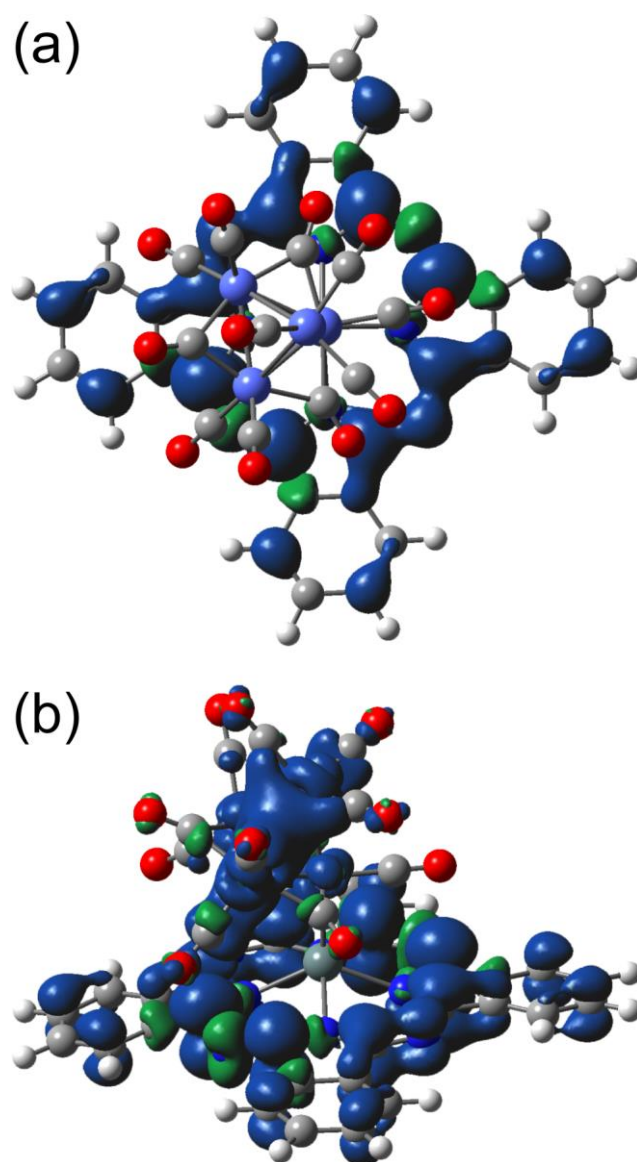

**Figure S23.** Spin density distributions of the (a)  $^3A$  and (b)  $^5A$  states in  $\{\text{Co}_4(\text{CO})_{11}\cdot\text{Sn}^{\text{II}}(\text{Pc}^{2-})\}$  calculated at the UMN12-L/cc-pVTZ-PP/cc-pVTZ/cc-pVDZ level of theory.

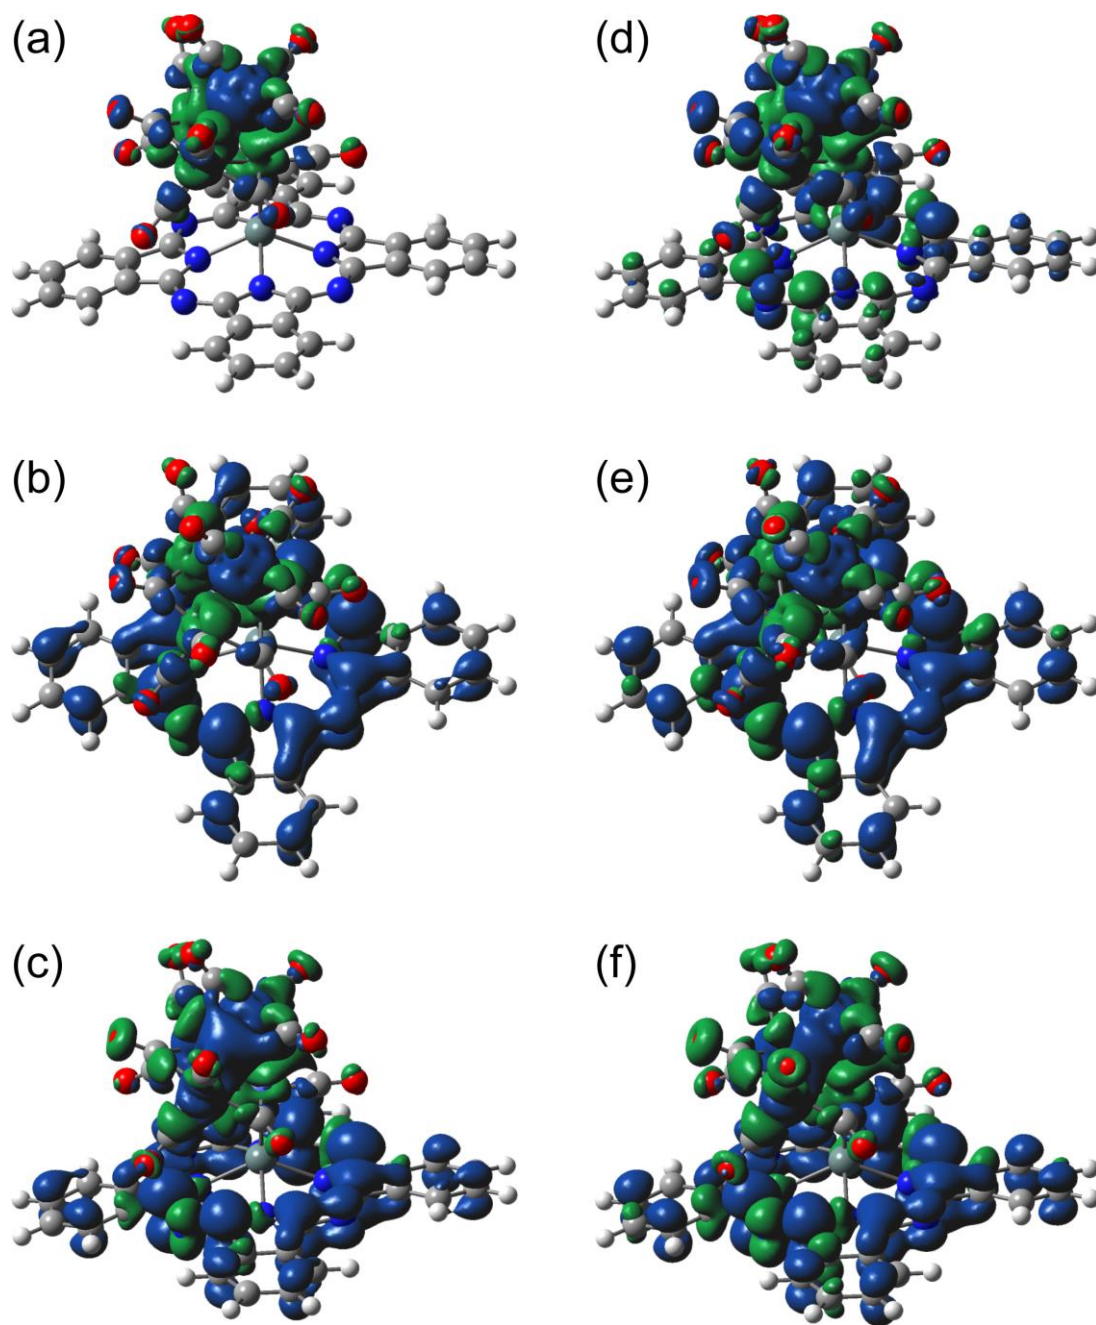

**Figure S24.** Spin density distributions in  $\{\text{Co}_4(\text{CO})_{11}\cdot\text{Sn}^{\text{II}}(\text{Pc}^{2-})\}$ . The (a)  $^1A$ , (b)  $^3A$ , and (c)  $^5A$  states calculated at the UMN12-SX/cc-pVTZ-PP/cc-pVTZ/cc-pVDZ level of theory. The (d)  $^1A$ , (e)  $^3A$ , and (f)  $^5A$  states calculated at the UCAM-B3LYP-D3(BJ)/cc-pVTZ-PP/cc-pVTZ/cc-pVDZ level of theory.

## References

1. D. V. Konarev, S. S. Khasanov, E. I. Yudanova, R. N. Lyubovskaya, *Eur. J. Inorg. Chem.*, 2011, 816-820.
2. D. V. Konarev, A. V. Kuzmin, S. S. Khasanov, A. F. Shestakov, A. L. Litvinov, P. A. Sobov, A. Otsuka, H. Yamochi, H. Kitagawa, R. N. Lyubovskaya, *Inorg. Chem.*, 2020, 59, 1169 – 1175.
3. G. M. Sheldrick, *Acta Cryst. Sect. C.* 2015, **71**, 3-8.
4. D. V. Konarev, A. V. Kuzmin, R. S. Galkin, S. S. Khasanov, R. F. Kurbanov, A. Otsuka, H. Yamochi, H. Kitagawa, R. N. Lyubovskaya, *Z. Anorg. Allg. Chem.* 2019, **645**, 472–483.
5. R. Peverati, D. G. Truhlar, *Phys. Chem. Chem. Phys.*, 2012, 14, 13171-13174
6. R. Peverati, D. G. Truhlar, *Phys. Chem. Chem. Phys.*, 2012, 14, 16187-16191
7. (a) T. Yanai, D. Tew, N. Handy, *Chem. Phys. Lett.*, 2004, 393, 51-57, (b) S. Grimme, S. Ehrlich, L. Goerigk, *J. Comp. Chem.*, 2011, 32, 1456-1465
8. K. A. Peterson, *J. Chem. Phys.*, 2003, 119, 11099
9. N. B. Balabanov, K. A. Peterson, *J. Chem. Phys.* 123, 064107 (2005)
10. T. H. Dunning Jr., *J. Chem. Phys.*, 1989, 90, 1007
11. E. D. Glendening, A. E. Reed, J. E. Carpenter and F. Weinhold, NBO, Version 3.1
12. M. J. Frisch, G. W. Trucks, H. B. Schlegel, G. E. Scuseria, M. A. Robb, J. R. Cheeseman, G. Scalmani, V. Barone, B. Mennucci, G. A. Petersson, H. Nakatsuji, M. Caricato, X. Li, H. P. Hratchian, A. F. Izmaylov, J. Bloino, G. Zheng, J. L. Sonnenberg, M. Hada, M. Ehara, K. Toyota, R. Fukuda, J. Hasegawa, M. Ishida, T. Nakajima, Y. Honda, O. Kitao, H. Nakai, T. Vreven, J. A. Montgomery Jr., J. E. Peralta, F. Ogliaro, M. Bearpark, J. J. Heyd, E. Brothers, K. N. Kudin, V. N. Staroverov, T. Keith, R. Kobayashi, J. Normand, K. Raghavachari, A. Rendell, J. C. Burant, S. S. Iyengar, J. Tomasi, M. Cossi, N. Rega, J. M. Millam, M. Klene, J. E. Knox, J. B. Cross, V. Bakken, C. Adamo, J. Jaramillo, R. Gomperts, R. E. Stratmann, O. Yazyev, A. J. Austin, R. Cammi, C. Pomelli, J. W. Ochterski, R. L. Martin, K. Morokuma, V. G. Zakrzewski, G. A. Voth, P. Salvador, J. J. Dannenberg, S. Dapprich, A. D. Daniels, O. Farkas, J. B. Foresman, J. V. Ortiz,

J. Cioslowski and D. J. Fox, Gaussian 09, Revision E.01, Gaussian, Inc., Wallingford CT, 2013.
